# Supplementary material for: Noncovalent bond between tetrel π-hole and hydride
Source: Royal Society of Chemistry journal article supplement (doi:10.1039/d1cp01245b), 2021-01-01
Supplement: d1cp01245b1.pdf [file d1cp01245b1.pdf]

Table S1 Energy density ( $H$ , au) at the T-H BCP in the binary systems

|            | $H$     |            | $H$     |
|------------|---------|------------|---------|
| <b>B1</b>  | -0.0462 | <b>B19</b> | -0.0485 |
| <b>B2</b>  | -0.0539 | <b>B20</b> | -0.0505 |
| <b>B3</b>  | -0.0471 | <b>B21</b> | -0.0498 |
| <b>B4</b>  | -0.0505 | <b>B22</b> | -0.0596 |
| <b>B5</b>  | -0.0556 | <b>B23</b> | -0.0617 |
| <b>B6</b>  | -0.0573 | <b>B24</b> | -0.0619 |
| <b>B7</b>  | -0.0281 | <b>B25</b> | -0.0230 |
| <b>B8</b>  | -0.0261 | <b>B26</b> | -0.0301 |
| <b>B9</b>  | -0.0262 | <b>B27</b> | -0.0299 |
| <b>B10</b> | -0.0389 | <b>B28</b> | -0.0402 |
| <b>B11</b> | -0.0470 | <b>B29</b> | -0.0504 |
| <b>B12</b> | -0.0475 | <b>B30</b> | -0.0497 |
| <b>B13</b> | -0.0578 | <b>B31</b> | -0.0598 |
| <b>B14</b> | -0.0569 | <b>B32</b> | -0.0618 |
| <b>B15</b> | -0.0579 | <b>B33</b> | -0.0616 |
| <b>B16</b> | -0.0285 | <b>B34</b> | -0.0295 |
| <b>B17</b> | -0.0268 | <b>B35</b> | -0.0299 |
| <b>B18</b> | -0.0266 | <b>B36</b> | -0.0295 |

Table S2. Electrostatic ( $E^{\text{ele}}$ ), exchange ( $E^{\text{ex}}$ ), repulsion ( $E^{\text{rep}}$ ), polarization ( $E^{\text{pol}}$ ), and dispersion ( $E^{\text{disp}}$ ) energies in the binary systems, all in kcal/mol

|            | $E^{\text{ele}}$ | $E^{\text{ex}}$ | $E^{\text{rep}}$ | $E^{\text{pol}}$ | $E^{\text{disp}}$ |
|------------|------------------|-----------------|------------------|------------------|-------------------|
| <b>B1</b>  | -33.99           | -54.73          | 110.68           | -44.18           | -2.26             |
| <b>B2</b>  | -40.32           | -59.08          | 122.43           | -43.08           | -1.09             |
| <b>B3</b>  | -29.26           | -46.08          | 92.10            | -33.77           | -2.31             |
| <b>B4</b>  | -35.84           | -57.73          | 117.33           | -47.89           | -1.56             |
| <b>B5</b>  | -43.35           | -63.16          | 131.65           | -47.39           | -0.35             |
| <b>B6</b>  | -30.89           | -49.56          | 97.85            | -36.87           | -1.81             |
| <b>B7</b>  | -45.89           | -68.90          | 141.73           | -58.63           | -0.07             |
| <b>B8</b>  | -57.58           | -77.27          | 163.31           | -59.58           | -1.00             |
| <b>B9</b>  | -41.94           | -62.12          | 123.51           | -46.93           | -0.96             |
| <b>B10</b> | -40.45           | -75.08          | 145.68           | -47.07           | -6.44             |
| <b>B11</b> | -40.85           | -66.61          | 134.85           | -42.64           | -3.85             |
| <b>B12</b> | -30.07           | -51.80          | 100.75           | -34.43           | -3.48             |
| <b>B13</b> | -37.75           | -69.20          | 137.05           | -48.82           | -4.27             |
| <b>B14</b> | -44.12           | -71.24          | 145.15           | -47.12           | -3.23             |
| <b>B15</b> | -31.74           | -54.69          | 106.78           | -37.57           | -2.98             |
| <b>B16</b> | -48.12           | -82.10          | 164.63           | -60.48           | -2.95             |
| <b>B17</b> | -58.56           | -86.62          | 179.20           | -59.84           | -1.97             |
| <b>B18</b> | -42.79           | -67.68          | 133.23           | -47.81           | -2.03             |
| <b>B19</b> | -32.00           | -65.99          | 128.11           | -43.42           | -6.55             |

|            |        |        |        |        |       |
|------------|--------|--------|--------|--------|-------|
| <b>B20</b> | -34.61 | -63.63 | 125.66 | -37.43 | -5.42 |
| <b>B21</b> | -26.53 | -51.61 | 98.49  | -34.13 | -5.03 |
| <b>B22</b> | -34.60 | -69.95 | 136.58 | -47.76 | -6.02 |
| <b>B23</b> | -35.89 | -65.17 | 128.70 | -40.42 | -4.15 |
| <b>B24</b> | -28.13 | -54.90 | 105.15 | -34.12 | -4.85 |
| <b>B25</b> | -45.23 | -85.03 | 168.10 | -61.12 | -4.82 |
| <b>B26</b> | -50.40 | -84.37 | 170.46 | -54.98 | -3.94 |
| <b>B27</b> | -36.26 | -65.92 | 127.06 | -42.95 | -3.39 |
| <b>B28</b> | -42.25 | -87.88 | 167.83 | -49.14 | -9.44 |
| <b>B29</b> | -36.47 | -72.38 | 141.01 | -38.75 | -7.98 |
| <b>B30</b> | -28.04 | -58.23 | 110.34 | -32.79 | -6.73 |
| <b>B31</b> | -37.60 | -81.89 | 158.01 | -50.47 | -8.28 |
| <b>B32</b> | -38.34 | -74.68 | 145.70 | -42.45 | -7.47 |
| <b>B33</b> | -29.76 | -61.75 | 117.41 | -35.91 | -6.56 |
| <b>B34</b> | -48.69 | -98.84 | 193.00 | -64.62 | -7.32 |
| <b>B35</b> | -53.22 | -95.59 | 190.68 | -57.49 | -6.76 |
| <b>B36</b> | -38.04 | -73.48 | 140.66 | -45.18 | -6.08 |

Table S3 Change of T-H and T'=Y bond lengths ( $\Delta r$ , Å), and related vibrational frequencies ( $\Delta \nu$ ,  $\text{cm}^{-1}$ ) caused by complexation.

|            | $\Delta r(\text{TH})$ | $\Delta r(\text{T}'\text{Y})$ | $\Delta \nu(\text{TH})$ | $\Delta \nu(\text{T}'\text{Y})$ |            | $\Delta r(\text{TH})$ | $\Delta r(\text{T}'\text{Y})$ | $\Delta \nu(\text{TH})$ | $\Delta \nu(\text{T}'\text{Y})$ |
|------------|-----------------------|-------------------------------|-------------------------|---------------------------------|------------|-----------------------|-------------------------------|-------------------------|---------------------------------|
| <b>B1</b>  | 0.071                 | 0.007                         | -125.5                  | -279.1                          | <b>B19</b> | 0.062                 | 0.005                         | -131.6                  | -165.2                          |
| <b>B2</b>  | 0.075                 | 0.011                         | -119.9                  | -180.7                          | <b>B20</b> | 0.058                 | 0.008                         | -125.9                  | -120.5                          |
| <b>B3</b>  | 0.068                 | 0.015                         | -118.8                  | -116.8                          | <b>B21</b> | 0.053                 | 0.011                         | -124.5                  | -80.4                           |
| <b>B4</b>  | 0.079                 | 0.008                         | -100.4                  | -277.0                          | <b>B22</b> | 0.059                 | 0.006                         | -104.7                  | -161.3                          |
| <b>B5</b>  | 0.085                 | 0.012                         | -94.9                   | -178.7                          | <b>B23</b> | 0.056                 | 0.009                         | -101.8                  | -119.4                          |
| <b>B6</b>  | 0.077                 | 0.016                         | -93.6                   | -114.6                          | <b>B24</b> | 0.051                 | 0.012                         | -100.2                  | -78.9                           |
| <b>B7</b>  | 0.112                 | 0.009                         | -67.2                   | -284.5                          | <b>B25</b> | 0.102                 | 0.007                         | -71.4                   | -168.6                          |
| <b>B8</b>  | 0.132                 | 0.013                         | -58.1                   | -182.5                          | <b>B26</b> | 0.101                 | 0.011                         | -66.5                   | -124.7                          |
| <b>B9</b>  | 0.125                 | 0.018                         | -57.3                   | -118.9                          | <b>B27</b> | 0.096                 | 0.013                         | -63.7                   | -83.2                           |
| <b>B10</b> | 0.072                 | 0.024                         | -133.8                  | -204.9                          | <b>B28</b> | 0.073                 | 0.021                         | -127.5                  | -147.4                          |
| <b>B11</b> | 0.073                 | 0.019                         | -125.0                  | -136.8                          | <b>B29</b> | 0.059                 | 0.017                         | -127.4                  | -110.8                          |
| <b>B12</b> | 0.066                 | 0.015                         | -123.1                  | -87.3                           | <b>B30</b> | 0.052                 | 0.022                         | -125.6                  | -72.3                           |
| <b>B13</b> | 0.079                 | 0.019                         | -106.8                  | -200.9                          | <b>B31</b> | 0.060                 | 0.016                         | -111.1                  | -153.9                          |
| <b>B14</b> | 0.082                 | 0.020                         | -100.1                  | -134.9                          | <b>B32</b> | 0.056                 | 0.018                         | -102.9                  | -109.3                          |
| <b>B15</b> | 0.075                 | 0.016                         | -98.5                   | -85.7                           | <b>B33</b> | 0.051                 | 0.023                         | -101.1                  | -70.7                           |
| <b>B16</b> | 0.113                 | 0.022                         | -70.1                   | -204.8                          | <b>B34</b> | 0.106                 | 0.019                         | -86.4                   | -169.9                          |
| <b>B17</b> | 0.127                 | 0.023                         | -61.9                   | -137.3                          | <b>B35</b> | 0.105                 | 0.022                         | -65.4                   | -112.5                          |
| <b>B18</b> | 0.122                 | 0.018                         | -61.1                   | -88.9                           | <b>B36</b> | 0.097                 | 0.025                         | -65.5                   | -75.8                           |

Table S4. The most positive MEP ( $V_{\max}$ , kcal/mol) on the  $\pi$ -hole of  $H_2T'Y$ 

|          | $V_{\max}$ |
|----------|------------|
| $H_2SiO$ | 53.90      |
| $H_2GeO$ | 50.45      |
| $H_2SnO$ | 55.09      |
| $H_2SiS$ | 44.74      |
| $H_2GeS$ | 44.18      |
| $H_2SnS$ | 52.46      |

Table S5 Interaction energy ( $E^{\text{int}}$ , kcal/mol) in binary systems containing unsubstituted  $H_2T'Y$ 

|                             | $E^{\text{int}}$ |                             | $E^{\text{int}}$ |
|-----------------------------|------------------|-----------------------------|------------------|
| $SiH(CH_3)_3 \cdots H_2SiO$ | -14.26           | $SiH(CH_3)_3 \cdots H_2SiS$ | -13.17           |
| $SiH(CH_3)_3 \cdots H_2GeO$ | -9.91            | $SiH(CH_3)_3 \cdots H_2GeS$ | -9.57            |
| $SiH(CH_3)_3 \cdots H_2SnO$ | -10.51           | $SiH(CH_3)_3 \cdots H_2SnS$ | -10.65           |
| $GeH(CH_3)_3 \cdots H_2SiO$ | -14.77           | $GeH(CH_3)_3 \cdots H_2SiS$ | -14.04           |
| $GeH(CH_3)_3 \cdots H_2GeO$ | -10.39           | $GeH(CH_3)_3 \cdots H_2GeS$ | -10.33           |
| $GeH(CH_3)_3 \cdots H_2SnO$ | -10.99           | $GeH(CH_3)_3 \cdots H_2SnS$ | -11.27           |
| $SnH(CH_3)_3 \cdots H_2SiO$ | -                | $SnH(CH_3)_3 \cdots H_2SiS$ | -20.61           |
| $SnH(CH_3)_3 \cdots H_2GeO$ | -                | $SnH(CH_3)_3 \cdots H_2GeS$ | -15.85           |
| $SnH(CH_3)_3 \cdots H_2SnO$ | -16.02           | $SnH(CH_3)_3 \cdots H_2SnS$ | -15.76           |

Table S6. Change of T-H bond length ( $\Delta r$ , Å) in the binary systems

|                            | $\Delta r$ |                            | $\Delta r$ |
|----------------------------|------------|----------------------------|------------|
| $SiH(CH_3)_3 \cdots H_2Si$ | 0.061      | $SiH(CH_3)_3 \cdots H_2Si$ | 0.058      |
| O                          | 0          | S                          | 0          |
| $SiH(CH_3)_3 \cdots H_2Ge$ | 0.052      | $SiH(CH_3)_3 \cdots H_2G$  | 0.050      |
| O                          | 0          | eS                         | 0          |
| $SiH(CH_3)_3 \cdots H_2Sn$ | 0.052      | $SiH(CH_3)_3 \cdots H_2S$  | 0.049      |
| O                          | 0          | nS                         | 0          |
| $GeH(CH_3)_3 \cdots H_2Si$ | 0.066      | $GeH(CH_3)_3 \cdots H_2S$  | 0.064      |
| O                          | 0          | iS                         | 0          |
| $GeH(CH_3)_3 \cdots H_2G$  | 0.057      | $GeH(CH_3)_3 \cdots H_2$   | 0.056      |
| eO                         | 0          | GeS                        | 0          |
| $GeH(CH_3)_3 \cdots H_2S$  | 0.057      | $GeH(CH_3)_3 \cdots H_2S$  | 0.054      |
| nO                         | 0          | nS                         | 0          |
| $SnH(CH_3)_3 \cdots H_2Si$ | --         | $SnH(CH_3)_3 \cdots H_2S$  | 0.104      |
| O                          |            | iS                         | 0          |
| $SnH(CH_3)_3 \cdots H_2G$  | --         | $SnH(CH_3)_3 \cdots H_2G$  | 0.096      |
| eO                         |            | eS                         | 0          |
| $SnH(CH_3)_3 \cdots H_2S$  | 0.105      | $SnH(CH_3)_3 \cdots H_2S$  | 0.089      |
| nO                         |            | nS                         | 0          |



## Cartesian coordinates of monomers and complexes

|                     |             |             |            |
|---------------------|-------------|-------------|------------|
| F <sub>2</sub> SiO  |             |             |            |
| Si                  | 0.00000000  | 0.13316500  | 0.00000000 |
| F                   | -1.24347400 | -0.83976000 | 0.00000000 |
| F                   | 1.24353400  | -0.83968000 | 0.00000000 |
| O                   | -0.00006700 | 1.65633200  | 0.00000000 |
| F <sub>2</sub> GeO  |             |             |            |
| Ge                  | 0.00000000  | 0.10917100  | 0.00000000 |
| F                   | -1.31862700 | -0.96600600 | 0.00000000 |
| F                   | 1.31884400  | -0.96573500 | 0.00000000 |
| O                   | -0.00024400 | 1.73652400  | 0.00000000 |
| F <sub>2</sub> SnO  |             |             |            |
| F                   | -1.43698600 | -1.14025200 | 0.00000000 |
| F                   | 1.43723100  | -1.13995800 | 0.00000000 |
| O                   | -0.00027600 | 1.91418200  | 0.00000000 |
| Sn                  | 0.00000000  | 0.10416900  | 0.00000000 |
| F <sub>2</sub> SiS  |             |             |            |
| Si                  | 0.00000000  | 0.27249400  | 0.00000000 |
| F                   | 1.23728100  | 1.26136600  | 0.00000000 |
| F                   | -1.23722000 | 1.26143900  | 0.00000000 |
| S                   | -0.00003400 | -1.65751000 | 0.00000000 |
| F <sub>2</sub> GeS  |             |             |            |
| Si                  | 0.00000000  | 0.13316500  | 0.00000000 |
| F                   | -1.24347400 | -0.83976000 | 0.00000000 |
| F                   | 1.24353400  | -0.83968000 | 0.00000000 |
| O                   | -0.00006700 | 1.65633200  | 0.00000000 |
| F <sub>2</sub> SnS  |             |             |            |
| F                   | 1.42268300  | 1.41134900  | 0.00000000 |
| F                   | -1.42143200 | 1.41274200  | 0.00000000 |
| Sn                  | 0.00000000  | 0.14880900  | 0.00000000 |
| S                   | -0.00070400 | -2.05357800 | 0.00000000 |
| Cl <sub>2</sub> SiO |             |             |            |
| Si                  | 0.00000000  | 0.50329000  | 0.00000000 |
| Cl                  | -1.63085900 | -0.68553800 | 0.00000000 |
| Cl                  | 1.63087800  | -0.68550500 | 0.00000000 |
| O                   | -0.00004000 | 2.03270800  | 0.00000000 |
| Cl <sub>2</sub> GeO |             |             |            |
| Ge                  | 0.00000000  | 0.40122800  | 0.00000000 |
| Cl                  | -1.68867700 | -0.85646900 | 0.00000000 |
| Cl                  | 1.68876000  | -0.85634200 | 0.00000000 |
| O                   | -0.00017700 | 2.03481300  | 0.00000000 |
| Cl <sub>2</sub> SnO |             |             |            |
| Sn                  | 0.00000000  | 0.21407800  | 0.00000000 |
| H                   | 1.41083400  | 1.15052300  | 0.00000000 |
| H                   | -1.41082300 | 1.15054200  | 0.00000000 |
| O                   | 0.00000000  | -1.62561900 | 0.00000000 |
| Cl <sub>2</sub> SiS |             |             |            |
| Si                  | 0.00000000  | 0.16256500  | 0.00000000 |
| Cl                  | -1.62003000 | -1.05580000 | 0.00000000 |
| Cl                  | 1.62014300  | -1.05564200 | 0.00000000 |
| S                   | -0.00012000 | 2.10116300  | 0.00000000 |
| Cl <sub>2</sub> GeS |             |             |            |
| Ge                  | 0.00000000  | 0.14224600  | 0.00000000 |
| Cl                  | -1.67214400 | -1.14721300 | 0.00000000 |
| Cl                  | 1.67244900  | -1.14680700 | 0.00000000 |

|                                                                       |             |             |             |
|-----------------------------------------------------------------------|-------------|-------------|-------------|
| S                                                                     | -0.00032400 | 2.15290500  | 0.00000000  |
| Cl <sub>2</sub> SnS                                                   |             |             |             |
| Sn                                                                    | 0.00000000  | 0.14250700  | 0.00000000  |
| Cl                                                                    | -1.78188300 | -1.31162700 | 0.00000000  |
| Cl                                                                    | 1.78259700  | -1.31073200 | 0.00000000  |
| S                                                                     | -0.00075900 | 2.34092100  | 0.00000000  |
| SiH(CH <sub>3</sub> ) <sub>3</sub>                                    |             |             |             |
| Si                                                                    | 0.00000000  | 0.00000000  | 0.38375800  |
| H                                                                     | 0.00000100  | -0.00000100 | 1.87221400  |
| C                                                                     | -1.32738000 | -1.18464100 | -0.22528300 |
| H                                                                     | -2.31444800 | -0.88329300 | 0.12629700  |
| H                                                                     | -1.35027300 | -1.20504000 | -1.31579400 |
| H                                                                     | -1.13976100 | -2.19950100 | 0.12625800  |
| C                                                                     | -0.36224000 | 1.74186500  | -0.22528300 |
| H                                                                     | -1.33493800 | 2.08681700  | 0.12627100  |
| H                                                                     | 0.39227700  | 2.44601500  | 0.12628500  |
| H                                                                     | -0.36847500 | 1.77188700  | -1.31579300 |
| C                                                                     | 1.68962000  | -0.55722400 | -0.22528400 |
| H                                                                     | 2.47470600  | 0.11268100  | 0.12627000  |
| H                                                                     | 1.92217300  | -1.56272900 | 0.12628300  |
| H                                                                     | 1.71873700  | -0.56683500 | -1.31579500 |
| GeH(CH <sub>3</sub> ) <sub>3</sub>                                    |             |             |             |
| Ge                                                                    | -0.00000500 | -0.00000500 | -0.28313900 |
| H                                                                     | -0.00002400 | -0.00002400 | -1.81204800 |
| C                                                                     | 1.30058800  | -1.29132600 | 0.35927700  |
| H                                                                     | 1.05560600  | -2.29335800 | 0.01112600  |
| H                                                                     | 2.30044300  | -1.04071300 | 0.00888700  |
| H                                                                     | 1.30922700  | -1.29796700 | 1.44849700  |
| C                                                                     | 0.46804900  | 1.77200200  | 0.35925000  |
| H                                                                     | 1.45781600  | 2.06135500  | 0.01006900  |
| H                                                                     | -0.24960500 | 2.51241200  | 0.00988300  |
| H                                                                     | 0.47070100  | 1.78248800  | 1.44847100  |
| C                                                                     | -1.76861700 | -0.48065700 | 0.35930400  |
| H                                                                     | -2.51409100 | 0.23183100  | 0.01013200  |
| H                                                                     | -2.05100900 | -1.47236900 | 0.00994100  |
| H                                                                     | -1.77901200 | -0.48360300 | 1.44852500  |
| SnH(CH <sub>3</sub> ) <sub>3</sub>                                    |             |             |             |
| H                                                                     | 0.00000200  | -0.00000300 | 1.94283500  |
| Sn                                                                    | 0.00000000  | 0.00000000  | 0.23953300  |
| C                                                                     | -1.90563200 | 0.63979800  | -0.47231300 |
| H                                                                     | -2.69100200 | -0.02681800 | -0.12274500 |
| H                                                                     | -2.12961200 | 1.64528600  | -0.12273300 |
| H                                                                     | -1.91728600 | 0.64371800  | -1.56043700 |
| C                                                                     | 0.39873500  | -1.97022300 | -0.47232100 |
| H                                                                     | 1.36872600  | -2.31706600 | -0.12275400 |
| H                                                                     | -0.36005400 | -2.66694100 | -0.12274300 |
| H                                                                     | 0.40116600  | -1.98227100 | -1.56044500 |
| C                                                                     | 1.50689500  | 1.33042700  | -0.47231700 |
| H                                                                     | 1.32227400  | 2.34388600  | -0.12274800 |
| H                                                                     | 2.48966500  | 1.02165600  | -0.12273900 |
| H                                                                     | 1.51611500  | 1.33856000  | -1.56044000 |
| SiH(CH <sub>3</sub> ) <sub>3</sub> ···F <sub>2</sub> SiO( <b>B1</b> ) |             |             |             |
| H                                                                     | -0.02804500 | -0.22586800 | 0.64212200  |
| Si                                                                    | -1.64442700 | -0.11576500 | 0.15203200  |
| F                                                                     | -1.75411000 | 1.43280600  | 0.53076200  |

|                                                               |             |             |             |
|---------------------------------------------------------------|-------------|-------------|-------------|
| F                                                             | -1.33703000 | -0.07173100 | -1.42137900 |
| O                                                             | -2.33194300 | -1.27420300 | 0.87816600  |
| Si                                                            | 1.40158100  | -0.03611900 | 0.05212600  |
| C                                                             | 2.41358100  | -0.10744000 | 1.61560600  |
| H                                                             | 2.14659600  | 0.70385900  | 2.29172100  |
| H                                                             | 2.26610100  | -1.05485100 | 2.13256200  |
| H                                                             | 3.47304000  | -0.01281400 | 1.37103800  |
| C                                                             | 1.40653500  | 1.62441100  | -0.78571500 |
| H                                                             | 0.73053800  | 1.62830500  | -1.63903900 |
| H                                                             | 1.10163500  | 2.40979300  | -0.09515200 |
| H                                                             | 2.41388500  | 1.85062600  | -1.13957800 |
| C                                                             | 1.63234900  | -1.49351800 | -1.07955700 |
| H                                                             | 1.45304800  | -2.42825500 | -0.54926200 |
| H                                                             | 0.94878400  | -1.43465900 | -1.92493700 |
| H                                                             | 2.65526100  | -1.50653600 | -1.45946700 |
| <b>SiH(CH<sub>3</sub>)<sub>3</sub>···F<sub>2</sub>GeO(B2)</b> |             |             |             |
| H                                                             | 0.27835100  | -0.26230700 | 0.61568100  |
| Ge                                                            | -1.37664200 | -0.08289500 | 0.10455100  |
| F                                                             | -1.37087400 | 1.60299800  | 0.45846800  |
| F                                                             | -0.96612900 | -0.05573900 | -1.57503000 |
| O                                                             | -2.24280500 | -1.25111400 | 0.85827400  |
| Si                                                            | 1.72769000  | -0.05677400 | 0.06832400  |
| C                                                             | 2.69881100  | -0.15414000 | 1.65582400  |
| H                                                             | 2.41600200  | 0.64904300  | 2.33520400  |
| H                                                             | 2.53675700  | -1.10819000 | 2.15592900  |
| H                                                             | 3.76438200  | -0.05832000 | 1.43985800  |
| C                                                             | 1.73890700  | 1.61645200  | -0.73927600 |
| H                                                             | 1.07902100  | 1.62750800  | -1.60505800 |
| H                                                             | 1.41008000  | 2.38521900  | -0.04124300 |
| H                                                             | 2.75183700  | 1.85647300  | -1.06722100 |
| C                                                             | 1.97857800  | -1.49540600 | -1.08254900 |
| H                                                             | 1.79757000  | -2.44058500 | -0.57163000 |
| H                                                             | 1.30302600  | -1.42044500 | -1.93323300 |
| H                                                             | 3.00555400  | -1.49877800 | -1.45159700 |
| <b>SiH(CH<sub>3</sub>)<sub>3</sub>···F<sub>2</sub>SnO(B3)</b> |             |             |             |
| H                                                             | -0.59384200 | -0.34508400 | -0.62052500 |
| Sn                                                            | 1.24988700  | -0.06559600 | -0.06959100 |
| O                                                             | 2.29643700  | -1.36314800 | -0.81220100 |
| F                                                             | 1.07229200  | 1.78873700  | -0.53450700 |
| F                                                             | 0.63683600  | 0.07345200  | 1.75252700  |
| Si                                                            | -2.03853900 | -0.09494600 | -0.09928700 |
| C                                                             | -3.02814400 | -0.32192600 | -1.66310100 |
| H                                                             | -2.74171100 | 0.41029900  | -2.41707600 |
| H                                                             | -2.88678900 | -1.32046500 | -2.07489900 |
| H                                                             | -4.08970500 | -0.18966000 | -1.44687300 |
| C                                                             | -2.04240500 | 1.63659200  | 0.57476300  |
| H                                                             | -1.37693700 | 1.70797300  | 1.43369500  |
| H                                                             | -1.71212000 | 2.34991000  | -0.17905000 |
| H                                                             | -3.05232100 | 1.90450500  | 0.88993600  |
| C                                                             | -2.29549400 | -1.42761500 | 1.17358900  |
| H                                                             | -2.14328500 | -2.41782600 | 0.74514800  |
| H                                                             | -1.60130000 | -1.28931900 | 2.00151500  |
| H                                                             | -3.31418000 | -1.37811200 | 1.56161500  |
| <b>GeH(CH<sub>3</sub>)<sub>3</sub>···F<sub>2</sub>SiO(B4)</b> |             |             |             |
| H                                                             | -0.30208600 | -0.22507800 | 0.67456800  |

|                                                               |             |             |             |
|---------------------------------------------------------------|-------------|-------------|-------------|
| Si                                                            | -1.90557400 | -0.11074100 | 0.17381600  |
| F                                                             | -1.98435200 | 1.47258300  | 0.38781300  |
| F                                                             | -1.60473900 | -0.23201700 | -1.39873700 |
| O                                                             | -2.63405700 | -1.16804700 | 1.00765400  |
| Ge                                                            | 1.15976700  | -0.02336500 | 0.03613400  |
| C                                                             | 2.21652300  | 0.03380000  | 1.64758200  |
| H                                                             | 1.92272600  | 0.87854800  | 2.26635900  |
| H                                                             | 2.09584300  | -0.88555500 | 2.21581700  |
| H                                                             | 3.26620000  | 0.14527500  | 1.37757400  |
| C                                                             | 1.09301900  | 1.63440200  | -0.93784600 |
| H                                                             | 0.39437800  | 1.55031600  | -1.76638900 |
| H                                                             | 0.77877900  | 2.44624600  | -0.28612900 |
| H                                                             | 2.08580000  | 1.85628800  | -1.32781300 |
| C                                                             | 1.40916400  | -1.59971600 | -1.03788200 |
| H                                                             | 1.26137900  | -2.49549000 | -0.43885100 |
| H                                                             | 0.70135900  | -1.59870600 | -1.86301700 |
| H                                                             | 2.42317500  | -1.60542700 | -1.43585700 |
| <b>GeH(CH<sub>3</sub>)<sub>3</sub>···F<sub>2</sub>GeO(B5)</b> |             |             |             |
| H                                                             | -0.00698400 | -0.24902400 | 0.64866300  |
| Ge                                                            | -1.64466600 | -0.08201800 | 0.11935700  |
| F                                                             | -1.63501900 | 1.62668800  | 0.35374500  |
| F                                                             | -1.23328400 | -0.16663900 | -1.56088600 |
| O                                                             | -2.54550000 | -1.18323200 | 0.93306700  |
| Ge                                                            | 1.47608100  | -0.03621600 | 0.04784900  |
| C                                                             | 2.49919600  | -0.05201100 | 1.68159500  |
| H                                                             | 2.20550500  | 0.77575100  | 2.32292500  |
| H                                                             | 2.35450300  | -0.98860700 | 2.21500900  |
| H                                                             | 3.55550800  | 0.05286900  | 1.43557200  |
| C                                                             | 1.42585500  | 1.65629600  | -0.86151000 |
| H                                                             | 0.74162800  | 1.59868600  | -1.70414100 |
| H                                                             | 1.09439100  | 2.44046200  | -0.18517100 |
| H                                                             | 2.42572400  | 1.89409000  | -1.22305600 |
| C                                                             | 1.72186200  | -1.57419100 | -1.08046600 |
| H                                                             | 1.56408800  | -2.49199400 | -0.51844500 |
| H                                                             | 1.01887200  | -1.53156800 | -1.90858600 |
| H                                                             | 2.73875600  | -1.57235400 | -1.47130500 |
| <b>GeH(CH<sub>3</sub>)<sub>3</sub>···F<sub>2</sub>SnO(B6)</b> |             |             |             |
| H                                                             | -0.30765900 | -0.32082400 | -0.64995900 |
| Sn                                                            | 1.52635700  | -0.06662500 | -0.07991900 |
| O                                                             | 2.59827800  | -1.31710500 | -0.86816100 |
| F                                                             | 1.35612200  | 1.81218600  | -0.44567600 |
| F                                                             | 0.90946200  | -0.01436200 | 1.74807200  |
| Ge                                                            | -1.78364800 | -0.06267200 | -0.07148200 |
| C                                                             | -2.83468700 | -0.22771300 | -1.67968400 |
| H                                                             | -2.54159200 | 0.52513100  | -2.40773000 |
| H                                                             | -2.71459300 | -1.21580500 | -2.11779000 |
| H                                                             | -3.88459100 | -0.08104800 | -1.42799100 |
| C                                                             | -1.73073700 | 1.70239100  | 0.68801300  |
| H                                                             | -1.05327900 | 1.71007500  | 1.53826600  |
| H                                                             | -1.38570900 | 2.42483900  | -0.04763100 |
| H                                                             | -2.73164600 | 1.97632900  | 1.01977600  |
| C                                                             | -2.02791500 | -1.48579800 | 1.20073300  |
| H                                                             | -1.89387400 | -2.45674400 | 0.72891000  |
| H                                                             | -1.30822100 | -1.37046200 | 2.00774100  |
| H                                                             | -3.03639000 | -1.43158100 | 1.60913500  |



**SnH(CH<sub>3</sub>)<sub>3</sub>···F<sub>2</sub>SiO(B7)**

|    |             |             |             |
|----|-------------|-------------|-------------|
| H  | -0.60561800 | -0.18504100 | 0.77049200  |
| Si | -2.15389100 | -0.10531600 | 0.21991600  |
| F  | -2.24243900 | 1.49590800  | 0.26663400  |
| F  | -1.78701600 | -0.37002300 | -1.32998900 |
| O  | -2.97654100 | -1.06767500 | 1.08321300  |
| Sn | 1.03535300  | -0.01176200 | 0.01364700  |
| C  | 2.16963700  | 0.21626000  | 1.78868400  |
| H  | 1.85360600  | 1.10863700  | 2.32235100  |
| H  | 2.03547000  | -0.65018300 | 2.43083700  |
| H  | 3.22475400  | 0.31006800  | 1.53920400  |
| C  | 0.85473600  | 1.71417100  | -1.18863900 |
| H  | 0.15408900  | 1.51317300  | -1.99418800 |
| H  | 0.47996700  | 2.53926100  | -0.58869200 |
| H  | 1.82191000  | 1.98469400  | -1.60655900 |
| C  | 1.25014700  | -1.86314700 | -0.97902200 |
| H  | 1.08324800  | -2.67919100 | -0.28068300 |
| H  | 0.51853100  | -1.92182800 | -1.78009000 |
| H  | 2.25115400  | -1.95235400 | -1.39549000 |

**SnH(CH<sub>3</sub>)<sub>3</sub>···F<sub>2</sub>GeO(B8)**

|    |             |             |             |
|----|-------------|-------------|-------------|
| H  | -0.33014300 | -0.20231400 | 0.75920800  |
| Ge | -1.89947500 | -0.07260800 | 0.15551300  |
| F  | -1.85427600 | 1.65633400  | 0.08007300  |
| F  | -1.39802600 | -0.44796000 | -1.47161100 |
| O  | -2.94687300 | -0.97406500 | 1.03964000  |
| Sn | 1.33956700  | -0.01871600 | 0.02476500  |
| C  | 2.40444300  | 0.26970200  | 1.83393800  |
| H  | 2.05501100  | 1.17021700  | 2.33198500  |
| H  | 2.25989500  | -0.58285500 | 2.49220200  |
| H  | 3.46658800  | 0.37446600  | 1.62102900  |
| C  | 1.16331300  | 1.66950500  | -1.22554000 |
| H  | 0.47967200  | 1.43398100  | -2.03600000 |
| H  | 0.76427700  | 2.50324500  | -0.65448900 |
| H  | 2.13671300  | 1.93828700  | -1.63018300 |
| C  | 1.58793700  | -1.90209400 | -0.89539600 |
| H  | 1.43497000  | -2.69556200 | -0.16851200 |
| H  | 0.85800400  | -1.99733100 | -1.69440600 |
| H  | 2.59140300  | -1.98841800 | -1.30680900 |

**SnH(CH<sub>3</sub>)<sub>3</sub>···F<sub>2</sub>SnO(B9)**

|    |             |             |             |
|----|-------------|-------------|-------------|
| H  | -0.02097600 | -0.22964300 | 0.79394400  |
| Sn | -1.78585400 | -0.05833500 | 0.10862600  |
| O  | -3.03199800 | -1.08666600 | 0.96343600  |
| F  | -1.60201400 | 1.86099200  | 0.10282000  |
| F  | -1.01714500 | -0.36862600 | -1.64833700 |
| Sn | 1.63558000  | -0.03356300 | 0.04619000  |
| C  | 2.73299800  | 0.20528900  | 1.84460900  |
| H  | 2.39320000  | 1.09180100  | 2.37351500  |
| H  | 2.60033500  | -0.66408900 | 2.48318400  |
| H  | 3.79136700  | 0.31638400  | 1.61678000  |
| C  | 1.45850500  | 1.68834600  | -1.15652700 |
| H  | 0.97795100  | 1.41486100  | -2.09110900 |
| H  | 0.83802800  | 2.41767400  | -0.64257300 |
| H  | 2.43957300  | 2.11506900  | -1.35220100 |
| C  | 1.89383900  | -1.88991300 | -0.92577800 |
| H  | 1.80150800  | -2.70658400 | -0.21453800 |

|                                                                |             |             |             |
|----------------------------------------------------------------|-------------|-------------|-------------|
| H                                                              | 1.13060900  | -1.98598300 | -1.69306600 |
| H                                                              | 2.87847900  | -1.93484900 | -1.38639700 |
| <b>SiH(CH<sub>3</sub>)<sub>3</sub>···F<sub>2</sub>SiS(B10)</b> |             |             |             |
| Si                                                             | 1.58658200  | 0.06681400  | -0.03372600 |
| C                                                              | 1.72580500  | 1.53006700  | -1.16958900 |
| H                                                              | 1.76644200  | 1.21801600  | -2.21256800 |
| H                                                              | 0.86893600  | 2.18770400  | -1.02826100 |
| H                                                              | 2.63848500  | 2.08357800  | -0.94128800 |
| C                                                              | 1.42013200  | 0.46977600  | 1.77311600  |
| H                                                              | 0.64349400  | 1.21711500  | 1.92818500  |
| H                                                              | 1.17430400  | -0.42036000 | 2.35133100  |
| H                                                              | 2.37063500  | 0.86481800  | 2.13761000  |
| C                                                              | 2.80068400  | -1.30699300 | -0.38659500 |
| H                                                              | 2.58545900  | -2.18386800 | 0.22301800  |
| H                                                              | 2.77583700  | -1.59591900 | -1.43655200 |
| H                                                              | 3.81148800  | -0.96883700 | -0.15070900 |
| H                                                              | 0.25512400  | -0.62387600 | -0.46489900 |
| Si                                                             | -1.39765800 | -0.40665500 | -0.08326500 |
| F                                                              | -1.78826900 | -1.32820200 | -1.32802400 |
| F                                                              | -1.30655300 | -1.44796900 | 1.12905800  |
| S                                                              | -1.83509300 | 1.48799100  | 0.10756900  |
| <b>SiH(CH<sub>3</sub>)<sub>3</sub>···F<sub>2</sub>GeS(B11)</b> |             |             |             |
| Si                                                             | -1.91468000 | -0.24738900 | -0.05635000 |
| C                                                              | -2.71916800 | -1.17055700 | -1.46233500 |
| H                                                              | -2.50351300 | -0.69171400 | -2.41676500 |
| H                                                              | -2.37069300 | -2.20195400 | -1.50243100 |
| H                                                              | -3.80174000 | -1.18110000 | -1.32321700 |
| C                                                              | -2.04892700 | -1.09290100 | 1.59504000  |
| H                                                              | -1.67168300 | -2.11384800 | 1.54115900  |
| H                                                              | -1.47914800 | -0.54732200 | 2.34557200  |
| H                                                              | -3.09344300 | -1.13182500 | 1.90879500  |
| C                                                              | -2.25182400 | 1.58007800  | -0.04376400 |
| H                                                              | -1.67701900 | 2.06782100  | 0.74157600  |
| H                                                              | -1.98440900 | 2.02844100  | -0.99973900 |
| H                                                              | -3.31383500 | 1.75566700  | 0.13681700  |
| H                                                              | -0.41056500 | -0.40891000 | -0.43771400 |
| Ge                                                             | 1.16329400  | 0.23235100  | -0.01204600 |
| F                                                              | 0.91811300  | 1.58478600  | -1.05303600 |
| F                                                              | 0.56841400  | 0.90043100  | 1.46963800  |
| S                                                              | 2.53918400  | -1.23835700 | -0.19392200 |
| <b>SiH(CH<sub>3</sub>)<sub>3</sub>···F<sub>2</sub>SnS(B12)</b> |             |             |             |
| Si                                                             | -2.19233500 | -0.30997300 | -0.07832600 |
| C                                                              | -3.02996400 | -1.23282800 | -1.46583000 |
| H                                                              | -2.79663400 | -0.78385400 | -2.43057900 |
| H                                                              | -2.72237500 | -2.27772800 | -1.48380400 |
| H                                                              | -4.11212600 | -1.19871400 | -1.32784700 |
| C                                                              | -2.35199700 | -1.12342000 | 1.58778000  |
| H                                                              | -2.03586400 | -2.16557200 | 1.54985200  |
| H                                                              | -1.74178500 | -0.59458400 | 2.31875600  |
| H                                                              | -3.39220800 | -1.09555000 | 1.91641900  |
| C                                                              | -2.48631700 | 1.52447400  | -0.08445000 |
| H                                                              | -1.90064900 | 2.00210000  | 0.69930300  |
| H                                                              | -2.20419500 | 1.96058900  | -1.04170400 |
| H                                                              | -3.54405900 | 1.72647400  | 0.09325900  |
| H                                                              | -0.69617600 | -0.50630200 | -0.45142600 |

|    |            |             |             |
|----|------------|-------------|-------------|
| Sn | 1.05538900 | 0.20443800  | -0.00140800 |
| S  | 2.62693300 | -1.34590700 | -0.21065900 |
| F  | 0.64473400 | 1.71201300  | -1.11544700 |
| F  | 0.27171300 | 0.90754600  | 1.61214200  |

**GeH(CH<sub>3</sub>)<sub>3</sub>···F<sub>2</sub>SiS(B13)**

|    |             |             |             |
|----|-------------|-------------|-------------|
| H  | 0.15495400  | -0.35758200 | -0.42654900 |
| S  | 2.94949000  | -1.14300400 | -0.19680800 |
| F  | 1.48447200  | 1.54461500  | -1.02332000 |
| F  | 1.16488800  | 0.93841100  | 1.37339300  |
| Si | 1.65947000  | 0.30682000  | -0.02073700 |
| Ge | -1.38961300 | -0.15047600 | -0.03194000 |
| C  | -2.23482300 | -1.12641600 | -1.46474500 |
| H  | -2.00335600 | -0.67027800 | -2.42458700 |
| H  | -1.89965100 | -2.16108100 | -1.47014000 |
| H  | -3.31439200 | -1.10715900 | -1.31827500 |
| C  | -1.70175100 | 1.74821700  | -0.05962100 |
| H  | -1.09641000 | 2.23343400  | 0.70188800  |
| H  | -1.44918900 | 2.16106000  | -1.03345900 |
| H  | -2.75486700 | 1.93843500  | 0.14496800  |
| C  | -1.52516300 | -0.98151200 | 1.69846900  |
| H  | -1.16047900 | -2.00561900 | 1.65724400  |
| H  | -0.93890100 | -0.42098800 | 2.42243500  |
| H  | -2.56833400 | -0.99137300 | 2.01250700  |

**GeH(CH<sub>3</sub>)<sub>3</sub>···F<sub>2</sub>GeS(B14)**

|    |             |             |             |
|----|-------------|-------------|-------------|
| H  | -0.11742700 | -0.41212000 | -0.43438200 |
| Ge | 1.44561900  | 0.22035400  | -0.01372600 |
| F  | 1.21465300  | 1.59392900  | -1.03325000 |
| F  | 0.86882800  | 0.88150300  | 1.48105500  |
| S  | 2.82931700  | -1.24270700 | -0.21140300 |
| Ge | -1.66096200 | -0.17238900 | -0.03966400 |
| C  | -2.52472100 | -1.11449000 | -1.48396000 |
| H  | -2.28503800 | -0.65049900 | -2.43796400 |
| H  | -2.21120900 | -2.15575600 | -1.50257400 |
| H  | -3.60360200 | -1.07494300 | -1.33606900 |
| C  | -1.81176300 | -1.01808200 | 1.68183100  |
| H  | -1.47773600 | -2.05211900 | 1.63062600  |
| H  | -1.20513900 | -0.47798100 | 2.40440400  |
| H  | -2.85319000 | -1.00107500 | 2.00129300  |
| C  | -1.91153100 | 1.73350900  | -0.05046100 |
| H  | -1.29265000 | 2.18648900  | 0.71973600  |
| H  | -1.63601900 | 2.14606900  | -1.01797300 |
| H  | -2.95930700 | 1.95587300  | 0.14913500  |

**GeH(CH<sub>3</sub>)<sub>3</sub>···F<sub>2</sub>SnS(B15)**

|    |             |             |             |
|----|-------------|-------------|-------------|
| H  | -0.41312000 | -0.47949300 | -0.46406800 |
| Sn | 1.34139800  | 0.19681200  | -0.00387600 |
| S  | 2.90458800  | -1.36094600 | -0.23022400 |
| F  | 0.96249600  | 1.73672500  | -1.08718900 |
| F  | 0.57429500  | 0.89161200  | 1.62387300  |
| Ge | -1.94247200 | -0.21575100 | -0.05717300 |
| C  | -2.85707200 | -1.13860800 | -1.48276700 |
| H  | -2.60797400 | -0.69826400 | -2.44550100 |
| H  | -2.59017300 | -2.19289000 | -1.49140400 |
| H  | -3.93159100 | -1.05038700 | -1.32506200 |
| C  | -2.15302900 | 1.69468500  | -0.06004700 |
| H  | -1.54017500 | 2.12618200  | 0.72730500  |

|   |             |             |             |
|---|-------------|-------------|-------------|
| H | -1.84689600 | 2.11063300  | -1.01678400 |
| H | -3.19984600 | 1.93715800  | 0.12008200  |
| C | -2.10199400 | -1.04936500 | 1.67023400  |
| H | -1.82108600 | -2.09928800 | 1.62247500  |
| H | -1.45690500 | -0.53171200 | 2.37616400  |
| H | -3.13497600 | -0.97867200 | 2.00900900  |

**SnH(CH<sub>3</sub>)<sub>3</sub>···F<sub>2</sub>SiS(B16)**

|    |             |             |             |
|----|-------------|-------------|-------------|
| H  | 0.47464400  | -0.37081100 | -0.49695300 |
| S  | 3.29575800  | -1.09690400 | -0.28772200 |
| F  | 1.75905900  | 1.60731800  | -0.89505300 |
| F  | 1.39469200  | 0.75965500  | 1.42090200  |
| Si | 1.92376300  | 0.26586200  | -0.02523900 |
| Sn | -1.25840400 | -0.10526500 | -0.02233900 |
| C  | -2.18693300 | -1.02090200 | -1.69323000 |
| H  | -1.92176900 | -0.49070000 | -2.60409400 |
| H  | -1.86758400 | -2.05636600 | -1.77672700 |
| H  | -3.26812200 | -0.99415900 | -1.57178500 |
| C  | -1.44297100 | 1.99502000  | 0.09224900  |
| H  | -0.79153600 | 2.36462300  | 0.87912600  |
| H  | -1.14668000 | 2.44024000  | -0.85373100 |
| H  | -2.47199200 | 2.27063000  | 0.31265100  |
| C  | -1.36769000 | -1.18440600 | 1.79030100  |
| H  | -1.00494200 | -2.19793700 | 1.63932900  |
| H  | -0.74889700 | -0.69000900 | 2.53404800  |
| H  | -2.39591000 | -1.22492700 | 2.14340200  |

**SnH(CH<sub>3</sub>)<sub>3</sub>···F<sub>2</sub>GeS(B17)**

|    |             |             |             |
|----|-------------|-------------|-------------|
| H  | 0.20941800  | -0.43259300 | -0.51518100 |
| Ge | 1.70405000  | 0.18101400  | -0.01274400 |
| F  | 1.45839800  | 1.68566500  | -0.83550400 |
| F  | 1.06547200  | 0.62692800  | 1.54858100  |
| S  | 3.21303200  | -1.13440300 | -0.32491200 |
| Sn | -1.52737600 | -0.11783300 | -0.03189600 |
| C  | -2.44889100 | -0.91644300 | -1.76613500 |
| H  | -2.15173100 | -0.34511200 | -2.64162600 |
| H  | -2.15639200 | -1.95463900 | -1.89959500 |
| H  | -3.53123000 | -0.86587900 | -1.66307100 |
| C  | -1.68172300 | -1.30224200 | 1.70928400  |
| H  | -1.36845300 | -2.32080500 | 1.49477500  |
| H  | -1.03758800 | -0.88006800 | 2.47557300  |
| H  | -2.70994400 | -1.31638700 | 2.06471300  |
| C  | -1.63547800 | 1.97619200  | 0.18830200  |
| H  | -1.01170500 | 2.27102600  | 1.02707300  |
| H  | -1.26579900 | 2.45383000  | -0.71486600 |
| H  | -2.66419300 | 2.28188700  | 0.36701800  |

**SnH(CH<sub>3</sub>)<sub>3</sub>···F<sub>2</sub>SnS(B18)**

|    |             |             |             |
|----|-------------|-------------|-------------|
| H  | -0.09182000 | -0.44367500 | -0.60936900 |
| Sn | 1.60149300  | 0.16392000  | -0.00189600 |
| S  | 3.30318300  | -1.21350900 | -0.37176600 |
| F  | 1.23459600  | 1.88417600  | -0.78787800 |
| F  | 0.72067400  | 0.52682000  | 1.68955400  |
| Sn | -1.80378700 | -0.14420900 | -0.05167100 |
| C  | -2.79100800 | -0.78380600 | -1.81648900 |
| H  | -2.49817100 | -0.15701800 | -2.65468200 |
| H  | -2.53392500 | -1.81666900 | -2.03643400 |
| H  | -3.86854000 | -0.71016800 | -1.68256000 |

|   |             |             |             |
|---|-------------|-------------|-------------|
| C | -1.87399500 | 1.92631500  | 0.33597400  |
| H | -1.44164900 | 2.11406600  | 1.31421400  |
| H | -1.28424800 | 2.44601100  | -0.41452000 |
| H | -2.90130000 | 2.28235400  | 0.30658000  |
| C | -1.96082200 | -1.46267500 | 1.59011800  |
| H | -1.74405500 | -2.48155500 | 1.27955400  |
| H | -1.24773700 | -1.15302000 | 2.34913500  |
| H | -2.96729400 | -1.42770500 | 2.00202800  |

**SiH(CH<sub>3</sub>)<sub>3</sub>···Cl<sub>2</sub>SiO(B19)**

|    |             |             |             |
|----|-------------|-------------|-------------|
| H  | -0.33989700 | -0.21417900 | 0.62881300  |
| Si | 1.34750800  | 0.04750300  | 0.59198500  |
| Cl | 1.72681800  | -1.61632500 | -0.54477900 |
| Cl | 1.31525500  | 1.62569400  | -0.72438000 |
| O  | 1.71781500  | 0.18979500  | 2.07471800  |
| Si | -1.75502400 | -0.07047100 | 0.01324300  |
| C  | -2.68975200 | -1.38182300 | 0.95234600  |
| H  | -2.26609800 | -2.36793400 | 0.76472300  |
| H  | -2.65945200 | -1.18822800 | 2.02393300  |
| H  | -3.73387900 | -1.39235300 | 0.63451700  |
| C  | -1.57003000 | -0.42544200 | -1.80437000 |
| H  | -0.91946400 | 0.30609800  | -2.28109100 |
| H  | -1.15398600 | -1.41926700 | -1.96511800 |
| H  | -2.55060300 | -0.38112300 | -2.28272900 |
| C  | -2.24991700 | 1.67536100  | 0.42718100  |
| H  | -2.18834400 | 1.84947700  | 1.50104000  |
| H  | -1.60362600 | 2.39052700  | -0.07949200 |
| H  | -3.27899200 | 1.85232200  | 0.10923600  |

**SiH(CH<sub>3</sub>)<sub>3</sub>···Cl<sub>2</sub>GeO(B20)**

|    |             |             |             |
|----|-------------|-------------|-------------|
| H  | -0.56200400 | -0.19944100 | 0.60126900  |
| Ge | 1.20065300  | 0.04501600  | 0.45394300  |
| Cl | 1.45991300  | -1.70785700 | -0.74003800 |
| Cl | 1.05727500  | 1.64980100  | -0.95792100 |
| O  | 1.70259600  | 0.22256300  | 2.00646200  |
| Si | -1.99920800 | -0.06966600 | 0.04586500  |
| C  | -2.91998700 | -1.33397000 | 1.06115500  |
| H  | -2.52169600 | -2.33303900 | 0.88675800  |
| H  | -2.84397000 | -1.10981800 | 2.12453600  |
| H  | -3.97594600 | -1.33445000 | 0.78517300  |
| C  | -1.88755300 | -0.48653500 | -1.76487200 |
| H  | -1.23369800 | 0.21267400  | -2.28427900 |
| H  | -1.50130500 | -1.49507500 | -1.90747400 |
| H  | -2.88117500 | -0.43052900 | -2.21395600 |
| C  | -2.46438600 | 1.69698600  | 0.40684900  |
| H  | -2.37209800 | 1.91348300  | 1.47077500  |
| H  | -1.82247200 | 2.38196800  | -0.14549800 |
| H  | -3.49902000 | 1.87660400  | 0.10925900  |

**SiH(CH<sub>3</sub>)<sub>3</sub>···Cl<sub>2</sub>SnO(B21)**

|    |             |             |             |
|----|-------------|-------------|-------------|
| H  | 0.79623200  | 0.18161900  | 0.61011700  |
| Sn | -1.13278500 | -0.06095700 | 0.38068300  |
| O  | -1.77250700 | -0.32330800 | 2.07176200  |
| Cl | -1.24641300 | 1.88140300  | -0.90610000 |
| Cl | -0.79065400 | -1.70185900 | -1.25130600 |
| Si | 2.24844700  | 0.07663300  | 0.10559400  |
| C  | 3.14701600  | 1.27388000  | 1.21731900  |
| H  | 2.76030100  | 2.28473400  | 1.09173100  |

|   |            |             |             |
|---|------------|-------------|-------------|
| H | 3.04110300 | 0.98841000  | 2.26332300  |
| H | 4.21015500 | 1.28282500  | 0.97101100  |
| C | 2.19329900 | 0.58936300  | -1.68280400 |
| H | 1.55225100 | -0.07916700 | -2.25644200 |
| H | 1.81400600 | 1.60552400  | -1.78483700 |
| H | 3.19895800 | 0.55158100  | -2.10590000 |
| C | 2.69622600 | -1.71009900 | 0.38151900  |
| H | 2.60006300 | -1.97868600 | 1.43321100  |
| H | 2.04944500 | -2.36075900 | -0.20622000 |
| H | 3.72941700 | -1.88573600 | 0.07713400  |

**GeH(CH<sub>3</sub>)<sub>3</sub>···Cl<sub>2</sub>SiO(B22)**

|    |             |             |             |
|----|-------------|-------------|-------------|
| H  | -0.04573400 | -0.20098400 | 0.66366100  |
| Si | 1.62777500  | 0.04604500  | 0.60091200  |
| Cl | 1.99264000  | -1.62440800 | -0.53547300 |
| Cl | 1.59757600  | 1.61842900  | -0.72780400 |
| O  | 2.03357700  | 0.19704500  | 2.07416300  |
| Ge | -1.49490300 | -0.04697300 | 0.00794900  |
| C  | -2.48071700 | -1.37135700 | 1.00366000  |
| H  | -2.05221100 | -2.35836100 | 0.84429300  |
| H  | -2.46091800 | -1.14040700 | 2.06622700  |
| H  | -3.51546400 | -1.37795800 | 0.66232400  |
| C  | -1.26469800 | -0.45874300 | -1.85838000 |
| H  | -0.57485800 | 0.24671300  | -2.31517100 |
| H  | -0.87721300 | -1.46767100 | -1.97921200 |
| H  | -2.23120800 | -0.38676200 | -2.35714500 |
| C  | -1.97051200 | 1.77799300  | 0.39395600  |
| H  | -1.91607400 | 1.96542500  | 1.46406500  |
| H  | -1.29547900 | 2.45530200  | -0.12345000 |
| H  | -2.98954000 | 1.96113400  | 0.05427200  |

**GeH(CH<sub>3</sub>)<sub>3</sub>···Cl<sub>2</sub>GeO(B23)**

|    |             |             |             |
|----|-------------|-------------|-------------|
| H  | 0.27020000  | -0.18281200 | -0.62951900 |
| Ge | -1.47355200 | 0.04350000  | -0.46093800 |
| Cl | -1.71930900 | -1.71513800 | 0.73227300  |
| Cl | -1.33483600 | 1.64268700  | 0.96354100  |
| O  | -2.01575000 | 0.22892800  | -1.99992700 |
| Ge | 1.74224500  | -0.04585700 | -0.03188800 |
| C  | 2.71672800  | -1.31720700 | -1.10548200 |
| H  | 2.31588500  | -2.31791400 | -0.95997900 |
| H  | 2.65235100  | -1.05595300 | -2.15925800 |
| H  | 3.76360200  | -1.31087700 | -0.80332700 |
| C  | 1.58383000  | -0.52664700 | 1.82554800  |
| H  | 0.87557100  | 0.13254800  | 2.32206500  |
| H  | 1.24372800  | -1.55495200 | 1.92380200  |
| H  | 2.55887000  | -0.42636900 | 2.30229800  |
| C  | 2.18824800  | 1.79930800  | -0.35569300 |
| H  | 2.11769900  | 2.02858200  | -1.41668300 |
| H  | 1.50924800  | 2.44452900  | 0.19671500  |
| H  | 3.20831000  | 1.98617700  | -0.02132500 |

**GeH(CH<sub>3</sub>)<sub>3</sub>···Cl<sub>2</sub>SnO(B24)**

|    |             |             |             |
|----|-------------|-------------|-------------|
| Sn | 1.40601400  | -0.06164800 | -0.38494000 |
| O  | 2.08771400  | -0.34004000 | -2.05778900 |
| Cl | 1.50483300  | 1.89083600  | 0.89132100  |
| Cl | 1.05805900  | -1.68928300 | 1.26342800  |
| H  | -0.51227500 | 0.16781500  | -0.64120200 |
| Ge | -1.99408000 | 0.05180500  | -0.07743600 |

|   |             |             |             |
|---|-------------|-------------|-------------|
| C | -1.88375300 | 0.63983900  | 1.75244400  |
| H | -2.87075900 | 0.56552300  | 2.20853900  |
| H | -1.18917100 | 0.01064300  | 2.30457600  |
| H | -1.54572500 | 1.67233100  | 1.80211800  |
| C | -2.42368800 | -1.81319700 | -0.29517900 |
| H | -1.74597000 | -2.42003500 | 0.30103800  |
| H | -3.44507100 | -1.98689700 | 0.04192400  |
| H | -2.34442200 | -2.10629500 | -1.33982500 |
| C | -2.96452700 | 1.24110600  | -1.24465000 |
| H | -4.01565500 | 1.24186600  | -0.95809000 |
| H | -2.57785900 | 2.25426500  | -1.15995900 |
| H | -2.88227700 | 0.91285400  | -2.27826900 |

**SnH(CH<sub>3</sub>)<sub>3</sub>···Cl<sub>2</sub>SiO(B25)**

|    |             |             |             |
|----|-------------|-------------|-------------|
| Si | -1.89364500 | 0.06125900  | -0.62544500 |
| Cl | -2.21944900 | -1.63601200 | 0.49899500  |
| Cl | -1.78854500 | 1.59770500  | 0.76133300  |
| O  | -2.45249500 | 0.26682500  | -2.04230700 |
| H  | -0.27374600 | -0.16499900 | -0.79266000 |
| Sn | 1.34240400  | -0.03370000 | -0.00059600 |
| C  | 2.40042500  | -1.43652800 | -1.18533800 |
| H  | 1.95031000  | -2.42044800 | -1.08215300 |
| H  | 2.37246000  | -1.13791900 | -2.22990400 |
| H  | 3.43732900  | -1.48580000 | -0.85833100 |
| C  | 0.98255800  | -0.61810200 | 1.99696900  |
| H  | 0.23592800  | 0.03843300  | 2.43509200  |
| H  | 0.61722600  | -1.64117700 | 2.01829600  |
| H  | 1.90519600  | -0.55235000 | 2.57077600  |
| C  | 1.81765500  | 1.99763100  | -0.33965600 |
| H  | 1.76192600  | 2.21799300  | -1.40263800 |
| H  | 1.11066400  | 2.62619400  | 0.19457300  |
| H  | 2.82557100  | 2.20602600  | 0.01398100  |

**SnH(CH<sub>3</sub>)<sub>3</sub>···Cl<sub>2</sub>GeO(B26)**

|    |             |             |             |
|----|-------------|-------------|-------------|
| H  | -0.05823100 | -0.13699800 | -0.74014900 |
| Ge | -1.73787900 | 0.05205100  | -0.47635300 |
| Cl | -1.93323700 | -1.72840300 | 0.71114700  |
| Cl | -1.53065100 | 1.62496700  | 0.98992600  |
| O  | -2.44587800 | 0.27511000  | -1.94339200 |
| Sn | 1.59413200  | -0.03115600 | -0.02035000 |
| C  | 2.61065000  | -1.40296300 | -1.27571400 |
| H  | 2.16520500  | -2.38978100 | -1.17995700 |
| H  | 2.54512200  | -1.07949200 | -2.31116800 |
| H  | 3.65862200  | -1.45848200 | -0.98730100 |
| C  | 1.31247200  | -0.65566000 | 1.97733500  |
| H  | 0.53893500  | -0.04630700 | 2.43676400  |
| H  | 1.00597600  | -1.69782600 | 1.99647900  |
| H  | 2.24173100  | -0.54093200 | 2.53252100  |
| C  | 2.05403200  | 2.00974100  | -0.32411000 |
| H  | 2.04908500  | 2.24041700  | -1.38622900 |
| H  | 1.31065500  | 2.62099200  | 0.18062700  |
| H  | 3.03862300  | 2.23143600  | 0.08303400  |

**SnH(CH<sub>3</sub>)<sub>3</sub>···Cl<sub>2</sub>SnO(B27)**

|    |             |             |             |
|----|-------------|-------------|-------------|
| H  | -0.19293300 | 0.12489700  | -0.75242400 |
| Sn | 1.67691100  | -0.07549700 | -0.39071500 |
| O  | 2.52840400  | -0.42506900 | -1.97181000 |
| Cl | 1.73167100  | 1.91834100  | 0.83695700  |

|    |             |             |             |
|----|-------------|-------------|-------------|
| Cl | 1.23374700  | -1.64379500 | 1.30901900  |
| Sn | -1.85116300 | 0.03618100  | -0.05918000 |
| C  | -2.88731700 | 1.28527600  | -1.42142100 |
| H  | -2.46574300 | 2.28683100  | -1.39985100 |
| H  | -2.80524800 | 0.88606800  | -2.42893200 |
| H  | -3.93901200 | 1.33942000  | -1.14733600 |
| C  | -1.61798300 | 0.80866200  | 1.89217100  |
| H  | -0.87780600 | 0.21894700  | 2.42621300  |
| H  | -1.28208900 | 1.84075800  | 1.84187300  |
| H  | -2.56780100 | 0.76340400  | 2.42173200  |
| C  | -2.28223500 | -2.02760000 | -0.21381100 |
| H  | -2.23523900 | -2.34309600 | -1.25289800 |
| H  | -1.55532000 | -2.58952000 | 0.36653100  |
| H  | -3.28032300 | -2.22666600 | 0.17112500  |

**SiH(CH<sub>3</sub>)<sub>3</sub>···Cl<sub>2</sub>SiS(B28)**

|    |             |             |             |
|----|-------------|-------------|-------------|
| Si | -1.88346900 | -0.09835100 | 0.12382300  |
| C  | -2.23737500 | 1.41048600  | 1.14923800  |
| H  | -2.07901400 | 1.21077300  | 2.20860300  |
| H  | -1.58537200 | 2.22697400  | 0.84044000  |
| H  | -3.27637400 | 1.71450000  | 1.00857400  |
| C  | -1.99985600 | 0.13438000  | -1.71637200 |
| H  | -1.39113700 | 0.98123700  | -2.03069700 |
| H  | -1.66583300 | -0.75800800 | -2.24472300 |
| H  | -3.04040200 | 0.32596300  | -1.98723500 |
| C  | -2.69164400 | -1.66557400 | 0.73956000  |
| H  | -2.33099400 | -2.53091100 | 0.18429100  |
| H  | -2.49190700 | -1.82125000 | 1.79905700  |
| H  | -3.77273400 | -1.59930900 | 0.60224200  |
| H  | -0.38835700 | -0.42725000 | 0.43036800  |
| Si | 1.14824600  | 0.15801700  | -0.04104400 |
| Cl | 1.94163800  | -0.49552300 | 1.73509900  |
| Cl | 1.41269100  | -1.39158400 | -1.36768300 |
| S  | 1.05405500  | 2.04043900  | -0.57815300 |

**SiH(CH<sub>3</sub>)<sub>3</sub>···Cl<sub>2</sub>GeS(B29)**

|    |             |             |             |
|----|-------------|-------------|-------------|
| Si | -2.11581900 | -0.22278600 | -0.13764300 |
| C  | -2.85770300 | -0.81011400 | -1.74506800 |
| H  | -2.53673900 | -0.17705600 | -2.57181000 |
| H  | -2.56077700 | -1.83671700 | -1.95729400 |
| H  | -3.94712000 | -0.77280500 | -1.68897800 |
| C  | -2.43643900 | -1.34580100 | 1.31304700  |
| H  | -2.11270700 | -2.36286400 | 1.09269700  |
| H  | -1.90247800 | -0.99349600 | 2.19451400  |
| H  | -3.50390700 | -1.36769300 | 1.53976200  |
| C  | -2.37364300 | 1.58886300  | 0.20296400  |
| H  | -1.81582100 | 1.89929800  | 1.08530200  |
| H  | -2.04739600 | 2.19117000  | -0.64415600 |
| H  | -3.43421800 | 1.78198600  | 0.37649100  |
| H  | -0.60309400 | -0.39385700 | -0.41079800 |
| Ge | 1.11333100  | -0.07744900 | -0.03524200 |
| Cl | 1.08309700  | 1.74757900  | -1.15497600 |
| Cl | 0.71575300  | 0.56463900  | 1.97461100  |
| S  | 2.11783700  | -1.76725000 | -0.53252600 |

**SiH(CH<sub>3</sub>)<sub>3</sub>···Cl<sub>2</sub>SnS(B30)**

|    |             |             |             |
|----|-------------|-------------|-------------|
| Si | -2.33903700 | -0.32646300 | -0.15447100 |
| C  | -3.04222100 | -1.07090700 | -1.71281500 |



|    |             |             |             |
|----|-------------|-------------|-------------|
| H  | -2.72044600 | -0.50924000 | -2.58931200 |
| H  | -2.72376900 | -2.10655900 | -1.82701400 |
| H  | -4.13279800 | -1.05037300 | -1.67638800 |
| C  | -2.65955900 | -1.32387700 | 1.38536900  |
| H  | -2.35119700 | -2.36022500 | 1.24898800  |
| H  | -2.11424500 | -0.90514600 | 2.23060900  |
| H  | -3.72477400 | -1.31263800 | 1.62252200  |
| C  | -2.64294800 | 1.50032700  | 0.02705300  |
| H  | -2.09615300 | 1.89833200  | 0.88113400  |
| H  | -2.32713600 | 2.03655400  | -0.86713900 |
| H  | -3.70824000 | 1.68208300  | 0.18193300  |
| H  | -0.82206900 | -0.47120700 | -0.37944600 |
| Sn | 1.04190900  | -0.04636300 | -0.01391100 |
| Cl | 0.83520700  | 1.85953800  | -1.34410700 |
| Cl | 0.44744300  | 0.81295100  | 2.07975400  |
| S  | 2.22720000  | -1.87990700 | -0.41696200 |

**GeH(CH<sub>3</sub>)<sub>3</sub>···Cl<sub>2</sub>SiS(B31)**

|    |             |             |             |
|----|-------------|-------------|-------------|
| H  | -0.09707400 | -0.34246700 | -0.41498400 |
| S  | 2.43641100  | -1.76419700 | -0.60065000 |
| Si | 1.53974900  | -0.11395800 | -0.05825400 |
| Cl | 1.63109300  | 1.66871500  | -1.08591700 |
| Cl | 1.25375100  | 0.44123700  | 1.91074100  |
| Ge | -1.64612400 | -0.11774700 | -0.08665400 |
| C  | -2.43481900 | -0.63853400 | -1.76765200 |
| H  | -2.08970200 | 0.01640100  | -2.56465300 |
| H  | -2.16754800 | -1.66516600 | -2.00790500 |
| H  | -3.51942000 | -0.56329200 | -1.69457300 |
| C  | -1.82130900 | 1.75110400  | 0.34021200  |
| H  | -1.24113000 | 1.98647600  | 1.22908600  |
| H  | -1.47102900 | 2.36235700  | -0.48838000 |
| H  | -2.87151100 | 1.97459300  | 0.52836200  |
| C  | -1.96792600 | -1.33602600 | 1.36885700  |
| H  | -1.63936900 | -2.33768800 | 1.09968500  |
| H  | -1.42911400 | -1.00840300 | 2.25449200  |
| H  | -3.03523100 | -1.36078700 | 1.58726800  |

**GeH(CH<sub>3</sub>)<sub>3</sub>···Cl<sub>2</sub>GeS(B32)**

|    |             |             |             |
|----|-------------|-------------|-------------|
| H  | -0.31952300 | -0.38481300 | -0.40294700 |
| Ge | 1.38202800  | -0.08738500 | -0.04356700 |
| S  | 2.38782600  | -1.76653400 | -0.57752000 |
| Cl | 1.37028000  | 1.76578400  | -1.12179600 |
| Cl | 1.01824100  | 0.52297400  | 1.98631900  |
| Ge | -1.86733700 | -0.15091000 | -0.09621300 |
| C  | -2.67088900 | -0.73713800 | -1.74899400 |
| H  | -2.33423600 | -0.11230500 | -2.57335400 |
| H  | -2.40598700 | -1.77205200 | -1.95371500 |
| H  | -3.75478800 | -0.65956300 | -1.66862200 |
| C  | -2.03790600 | 1.73399800  | 0.25604900  |
| H  | -1.41393700 | 2.01022800  | 1.10279400  |
| H  | -1.73332500 | 2.31015200  | -0.61459400 |
| H  | -3.07818900 | 1.96122500  | 0.48893700  |
| C  | -2.19810400 | -1.29969400 | 1.41393600  |
| H  | -1.90844300 | -2.32254500 | 1.18257600  |
| H  | -1.62996500 | -0.95192800 | 2.27339000  |
| H  | -3.26039700 | -1.28029400 | 1.65597900  |

**GeH(CH<sub>3</sub>)<sub>3</sub>···Cl<sub>2</sub>SnS(B33)**

|    |             |             |             |
|----|-------------|-------------|-------------|
| H  | -0.55137500 | -0.46016700 | -0.37496000 |
| Sn | 1.31053900  | -0.05742300 | -0.01934000 |
| S  | 2.49117500  | -1.88652200 | -0.45919500 |
| Cl | 1.12803600  | 1.87990400  | -1.31060300 |
| Cl | 0.74805500  | 0.77656700  | 2.09641500  |
| Ge | -2.10109200 | -0.22351200 | -0.11158200 |
| C  | -2.88983200 | -0.97774400 | -1.70072200 |
| H  | -2.54322400 | -0.44481200 | -2.58341200 |
| H  | -2.62869100 | -2.02961800 | -1.79324400 |
| H  | -3.97388900 | -0.88796200 | -1.63970700 |
| C  | -2.29960100 | 1.68343700  | 0.06032300  |
| H  | -1.68883000 | 2.04729800  | 0.88348000  |
| H  | -1.99482400 | 2.18254600  | -0.85686700 |
| H  | -3.34543400 | 1.91457800  | 0.26213900  |
| C  | -2.44089600 | -1.21633600 | 1.50401400  |
| H  | -2.18741700 | -2.26558900 | 1.36997700  |
| H  | -1.85068500 | -0.80498900 | 2.31995500  |
| H  | -3.49799900 | -1.13958600 | 1.75687000  |

**SnH(CH<sub>3</sub>)<sub>3</sub>···Cl<sub>2</sub>SiS(B34)**

|    |             |             |             |
|----|-------------|-------------|-------------|
| H  | 0.23306900  | -0.33725800 | -0.55052100 |
| S  | 2.88134100  | -1.43910400 | -1.04726700 |
| Si | 1.79776400  | -0.10544200 | -0.10965200 |
| Cl | 1.80881400  | 1.91536100  | -0.55072500 |
| Cl | 1.46069300  | -0.16237400 | 1.94087900  |
| Sn | -1.49701800 | -0.08044900 | -0.08918500 |
| C  | -2.34961500 | -0.14305500 | -2.02899600 |
| H  | -1.92532100 | 0.64776200  | -2.64224500 |
| H  | -2.14784000 | -1.10425800 | -2.49420800 |
| H  | -3.42652700 | 0.00012200  | -1.96233700 |
| C  | -1.52913900 | 1.80746600  | 0.85731800  |
| H  | -0.80800300 | 1.81275800  | 1.66989000  |
| H  | -1.26912300 | 2.58168000  | 0.14073900  |
| H  | -2.52443800 | 2.00072300  | 1.25393800  |
| C  | -1.85310000 | -1.77577000 | 1.12261900  |
| H  | -1.56616100 | -2.67714500 | 0.58702400  |
| H  | -1.26580900 | -1.69796800 | 2.03329800  |
| H  | -2.90960800 | -1.83476900 | 1.37679500  |

**SnH(CH<sub>3</sub>)<sub>3</sub>···Cl<sub>2</sub>GeS(B35)**

|    |             |             |             |
|----|-------------|-------------|-------------|
| Ge | 1.63490800  | -0.08556600 | -0.08119700 |
| S  | 2.81653800  | -1.47320100 | -0.98014800 |
| Cl | 1.56246200  | 2.00110800  | -0.60992000 |
| Cl | 1.22617400  | -0.04942500 | 2.04458500  |
| H  | 0.01054600  | -0.37004400 | -0.52096500 |
| Sn | -1.72678200 | -0.10149900 | -0.09929400 |
| C  | -2.57027000 | -0.24443200 | -2.03881500 |
| H  | -2.16747600 | 0.54084000  | -2.67334000 |
| H  | -2.33847800 | -1.21225100 | -2.47558800 |
| H  | -3.65124400 | -0.13194400 | -1.97943800 |
| C  | -1.76367500 | 1.82113400  | 0.77321600  |
| H  | -1.01762100 | 1.86801600  | 1.56172300  |
| H  | -1.53769700 | 2.57094400  | 0.02022300  |
| H  | -2.74913400 | 2.01375900  | 1.19381500  |
| C  | -2.08986700 | -1.74266100 | 1.18346400  |
| H  | -1.89675300 | -2.67503400 | 0.65916600  |
| H  | -1.43295400 | -1.67211500 | 2.04625000  |

|                                                                 |             |             |             |
|-----------------------------------------------------------------|-------------|-------------|-------------|
| H                                                               | -3.12571800 | -1.73074000 | 1.51704900  |
| <b>SnH(CH<sub>3</sub>)<sub>3</sub>···Cl<sub>2</sub>SnS(B36)</b> |             |             |             |
| H                                                               | -0.23941800 | -0.43853500 | -0.51482600 |
| Sn                                                              | 1.56945900  | -0.06596100 | -0.04678200 |
| S                                                               | 2.90214700  | -1.68401200 | -0.78723600 |
| Cl                                                              | 1.37074400  | 2.11348200  | -0.88202000 |
| Cl                                                              | 0.93674500  | 0.29141200  | 2.19350800  |
| Sn                                                              | -1.97116000 | -0.15128000 | -0.11592900 |
| C                                                               | -2.85026200 | -0.60338400 | -1.99050600 |
| H                                                               | -2.46193300 | 0.06729500  | -2.75258200 |
| H                                                               | -2.62408100 | -1.62909700 | -2.26977900 |
| H                                                               | -3.93019600 | -0.48290700 | -1.93175600 |
| C                                                               | -2.02928500 | 1.88064100  | 0.45453400  |
| H                                                               | -1.31883900 | 2.04703400  | 1.25971500  |
| H                                                               | -1.76298400 | 2.50809800  | -0.39158000 |
| H                                                               | -3.03063800 | 2.13797800  | 0.79503600  |
| C                                                               | -2.30633100 | -1.57896300 | 1.40677000  |
| H                                                               | -2.10222900 | -2.57884000 | 1.03227100  |
| H                                                               | -1.64947400 | -1.36745000 | 2.24621900  |
| H                                                               | -3.34155800 | -1.53026100 | 1.73855900  |

**F<sub>2</sub>SiO···H<sub>2</sub>O(A1)**

|    |             |             |             |
|----|-------------|-------------|-------------|
| Si | -0.15339900 | 0.25142900  | 0.06820900  |
| F  | -0.62175900 | -0.73888700 | 1.23749100  |
| F  | -1.15334600 | -0.10354000 | -1.11793000 |
| O  | 0.54595500  | 1.59930100  | 0.27782900  |
| O  | 1.28459300  | -0.84827400 | -0.48728700 |
| H  | 1.41685300  | -1.66842100 | 0.00920600  |
| H  | 2.06229500  | -0.27796200 | -0.36451300 |

**F<sub>2</sub>GeO···H<sub>2</sub>O(A2)**

|    |             |             |             |
|----|-------------|-------------|-------------|
| Ge | 0.17103200  | -0.18461200 | 0.05894700  |
| F  | -0.98330100 | -0.17160500 | 1.33936000  |
| F  | -0.64767600 | -1.12513500 | -1.11212000 |
| O  | 1.78292900  | 0.08940600  | 0.18698600  |
| O  | -0.51269700 | 1.58922000  | -0.60207600 |
| H  | 0.25365500  | 2.18379400  | -0.56558100 |
| H  | -1.20973700 | 1.96542900  | -0.04515400 |

**F<sub>2</sub>SnO···H<sub>2</sub>O(A3)**

|    |             |             |             |
|----|-------------|-------------|-------------|
| Sn | 0.22025100  | -0.12141700 | -0.06262400 |
| O  | 1.86593700  | 0.67078400  | -0.06404900 |
| F  | -1.10027400 | -0.17848600 | -1.45970600 |
| F  | -0.52381900 | -1.48494900 | 1.04548300  |
| O  | -1.10291600 | 1.46791800  | 0.78520400  |
| H  | -1.86792500 | 1.62401500  | 0.21297200  |
| H  | -0.63193600 | 2.30815500  | 0.87701700  |

**F<sub>2</sub>SiO···H<sub>2</sub>O(A4)**

|    |          |          |          |
|----|----------|----------|----------|
| Si | -0.29054 | 0.47488  | 0.12875  |
| F  | -1.17391 | -1.39656 | 2.33887  |
| F  | -2.17876 | -0.19845 | -2.11299 |
| O  | 1.02859  | 3.02331  | 0.52437  |
| O  | 2.42930  | -1.60102 | -0.92016 |
| H  | 2.68080  | -3.15005 | 0.01901  |
| H  | 3.89773  | -0.52162 | -0.68808 |

**F<sub>2</sub>GeO···H<sub>2</sub>O(A5)**

|    |            |             |             |
|----|------------|-------------|-------------|
| Ge | 0.17183600 | -0.18385700 | -0.05885300 |
|----|------------|-------------|-------------|

|                                                                                 |             |             |             |
|---------------------------------------------------------------------------------|-------------|-------------|-------------|
| F                                                                               | -0.98203000 | -0.17664400 | -1.33971400 |
| F                                                                               | -0.64311500 | -1.12715600 | 1.11261900  |
| O                                                                               | 1.78261000  | 0.09689200  | -0.18652100 |
| O                                                                               | -0.51980300 | 1.58717100  | 0.60132500  |
| H                                                                               | -1.21879800 | 1.95999900  | 0.04457600  |
| H                                                                               | 0.24389100  | 2.18512700  | 0.56413300  |
| <b>F<sub>2</sub>SnO···H<sub>2</sub>O(A6)</b>                                    |             |             |             |
| Sn                                                                              | -0.27151900 | 0.00208800  | 0.03964700  |
| O                                                                               | 1.14313700  | -0.13170000 | 1.21166200  |
| F                                                                               | -1.43188200 | 1.49584500  | -0.25192900 |
| F                                                                               | -1.49320300 | -1.42621400 | -0.37467800 |
| O                                                                               | 3.04902200  | -0.00731400 | -0.71270500 |
| H                                                                               | 2.49630600  | -0.03470300 | 0.10632200  |
| H                                                                               | 3.86811800  | 0.41571000  | -0.44086700 |
| <b>SiH(CH<sub>3</sub>)<sub>3</sub>···F<sub>2</sub>SiO···H<sub>2</sub>O(TT1)</b> |             |             |             |
| Si                                                                              | -1.50092700 | -0.04710200 | -0.05261700 |
| F                                                                               | -1.62647800 | 0.84629100  | -1.37777400 |
| F                                                                               | -1.54335200 | -1.55078500 | -0.57366000 |
| O                                                                               | -0.99252900 | 0.43335800  | 1.31929400  |
| H                                                                               | 0.61518400  | -0.21952200 | -0.84714500 |
| C                                                                               | 1.92873300  | 1.78383500  | 0.50004900  |
| H                                                                               | 1.86895800  | 2.46635800  | -0.34817600 |
| H                                                                               | 1.08755300  | 1.97217800  | 1.16590200  |
| H                                                                               | 2.85858300  | 1.98773500  | 1.03349700  |
| C                                                                               | 3.28128400  | -0.37010400 | -1.25943000 |
| H                                                                               | 3.22962800  | -1.39731100 | -1.62117300 |
| H                                                                               | 3.24803600  | 0.29624900  | -2.12171800 |
| H                                                                               | 4.24523100  | -0.23483400 | -0.76608200 |
| C                                                                               | 1.90100900  | -1.19490400 | 1.38110900  |
| H                                                                               | 1.06850800  | -0.96970300 | 2.04633500  |
| H                                                                               | 1.81227800  | -2.22699100 | 1.04089800  |
| H                                                                               | 2.83612800  | -1.10031400 | 1.93557900  |
| O                                                                               | -3.38542200 | 0.06826600  | 0.30745700  |
| H                                                                               | -3.89334500 | 0.62602200  | -0.29821400 |
| H                                                                               | -3.37332600 | 0.49399500  | 1.18227200  |
| Si                                                                              | 1.87824900  | -0.00142400 | -0.06048600 |
| <b>SiH(CH<sub>3</sub>)<sub>3</sub>···F<sub>2</sub>GeO···H<sub>2</sub>O(TT2)</b> |             |             |             |
| O                                                                               | -0.76699300 | -1.43573600 | -0.67671700 |
| F                                                                               | -1.45142300 | 0.33148800  | 1.70227200  |
| F                                                                               | -1.12460700 | 1.58223600  | -0.69042700 |
| Ge                                                                              | -1.10102900 | 0.02262800  | 0.03434700  |
| H                                                                               | 2.20440200  | -1.77601800 | 1.75191200  |
| H                                                                               | 1.43330000  | -2.36120200 | 0.26342600  |
| H                                                                               | 3.19773400  | -2.14494900 | 0.33802100  |
| C                                                                               | 3.23319700  | 1.20902200  | 0.78300300  |
| H                                                                               | 3.01728100  | 2.22771100  | 0.46190000  |
| H                                                                               | 3.20010000  | 1.17600600  | 1.87171000  |
| H                                                                               | 4.24830800  | 0.96198900  | 0.46734000  |
| C                                                                               | 1.93751500  | 0.12390600  | -1.82654300 |
| H                                                                               | 1.19301300  | -0.57542100 | -2.20478400 |
| H                                                                               | 1.66741400  | 1.13279100  | -2.13819400 |
| H                                                                               | 2.90927200  | -0.11904200 | -2.25968500 |
| O                                                                               | -3.14444800 | -0.20189400 | -0.25761800 |
| H                                                                               | -3.63395500 | -0.22340500 | 0.57612200  |
| H                                                                               | -3.10804100 | -1.11335500 | -0.59730900 |
| C                                                                               | 2.23669500  | -1.74336700 | 0.66301600  |

|                                                                                 |             |             |             |
|---------------------------------------------------------------------------------|-------------|-------------|-------------|
| Si                                                                              | 2.01848300  | -0.00414300 | 0.03184900  |
| H                                                                               | 0.67667700  | 0.48895500  | 0.57577200  |
| <b>SiH(CH<sub>3</sub>)<sub>3</sub>...F<sub>2</sub>SnO...H<sub>2</sub>O(TT3)</b> |             |             |             |
| Si                                                                              | -2.02704100 | -0.16610600 | 0.22945400  |
| F                                                                               | -1.91194800 | 1.39882600  | 0.60850800  |
| F                                                                               | -1.54508100 | -0.24459100 | -1.30353000 |
| O                                                                               | -2.37993400 | -1.34499000 | 1.16418200  |
| H                                                                               | -0.21051200 | -0.27964100 | 0.74346500  |
| C                                                                               | 2.69973500  | 0.05193400  | 1.66226700  |
| H                                                                               | 2.45682200  | 0.88178700  | 2.32140600  |
| H                                                                               | 2.64315600  | -0.87360400 | 2.22995100  |
| H                                                                               | 3.71865300  | 0.17901400  | 1.30192300  |
| C                                                                               | 1.22063900  | 1.84151900  | -1.01027800 |
| H                                                                               | 0.45013400  | 1.77471000  | -1.77436100 |
| H                                                                               | 0.95925900  | 2.63793200  | -0.31760200 |
| H                                                                               | 2.16982500  | 2.08349700  | -1.48348100 |
| C                                                                               | 1.67847400  | -1.66440900 | -1.26401700 |
| H                                                                               | 1.63379200  | -2.59294800 | -0.70004600 |
| H                                                                               | 0.90829900  | -1.68266000 | -2.03108700 |
| H                                                                               | 2.65363200  | -1.58903600 | -1.74047600 |
| O                                                                               | -3.91246000 | 0.10595300  | -0.30674300 |
| H                                                                               | -4.27509300 | 0.96394500  | -0.04865200 |
| H                                                                               | -4.25903600 | -0.56231100 | 0.31448300  |
| Sn                                                                              | 1.34777900  | -0.00930600 | 0.02080000  |
| <b>GeH(CH<sub>3</sub>)<sub>3</sub>...F<sub>2</sub>SiO...H<sub>2</sub>O(TT4)</b> |             |             |             |
| Si                                                                              | 1.93786200  | -0.16630300 | -0.20808500 |
| F                                                                               | 1.70871100  | 1.37343400  | -0.59721900 |
| F                                                                               | 1.35515500  | -0.26820200 | 1.27536900  |
| O                                                                               | 2.18042800  | -1.33196500 | -1.17869000 |
| H                                                                               | -0.30221500 | -0.28691100 | -0.81925500 |
| Ge                                                                              | -1.61508400 | -0.02293700 | -0.06538000 |
| C                                                                               | -3.03781800 | 0.04899900  | -1.38221300 |
| H                                                                               | -2.86092900 | 0.85151000  | -2.09593400 |
| H                                                                               | -3.10320900 | -0.89110900 | -1.92668600 |
| H                                                                               | -3.99056300 | 0.23000200  | -0.88610100 |
| C                                                                               | -1.46241200 | 1.66817400  | 0.87225100  |
| H                                                                               | -0.66837400 | 1.61213400  | 1.61432400  |
| H                                                                               | -1.23301400 | 2.47438600  | 0.17779300  |
| H                                                                               | -2.39878600 | 1.89938600  | 1.37848900  |
| C                                                                               | -1.89852300 | -1.47533400 | 1.18530600  |
| H                                                                               | -1.94487100 | -2.42919100 | 0.66317500  |
| H                                                                               | -1.08060000 | -1.51085700 | 1.90209700  |
| H                                                                               | -2.83313600 | -1.32710200 | 1.72474400  |
| O                                                                               | 3.75441300  | 0.14105200  | 0.32994600  |
| H                                                                               | 4.08972700  | 1.03608900  | 0.18006800  |
| H                                                                               | 4.21757800  | -0.46691200 | -0.27281600 |
| <b>GeH(CH<sub>3</sub>)<sub>3</sub>...F<sub>2</sub>GeO...H<sub>2</sub>O(TT5)</b> |             |             |             |
| Ge                                                                              | -1.38554200 | -0.02527500 | -0.04838200 |
| F                                                                               | -1.76871200 | -0.31220600 | -1.71398700 |
| F                                                                               | -1.40607400 | -1.59232000 | 0.66349400  |
| O                                                                               | -1.05686400 | 1.42698300  | 0.68143500  |
| H                                                                               | 0.36692600  | -0.47680300 | -0.62195400 |
| C                                                                               | 1.96628900  | 1.82626100  | -0.60714700 |
| H                                                                               | 1.97158800  | 1.89008000  | -1.69336400 |
| H                                                                               | 1.13526500  | 2.40476100  | -0.20957000 |
| H                                                                               | 2.90801700  | 2.22107200  | -0.22773400 |

|    |             |             |             |
|----|-------------|-------------|-------------|
| C  | 3.00066100  | -1.23067200 | -0.82085700 |
| H  | 2.76375000  | -2.25403300 | -0.53734000 |
| H  | 2.98318200  | -1.15061900 | -1.90575700 |
| H  | 4.00533600  | -0.99604300 | -0.47040000 |
| C  | 1.60968900  | -0.18865900 | 1.89212600  |
| H  | 0.86356900  | 0.51300300  | 2.25821500  |
| H  | 1.31656700  | -1.20237900 | 2.15749100  |
| H  | 2.57459900  | 0.03044700  | 2.34790500  |
| O  | -3.42694900 | 0.19816100  | 0.28230500  |
| H  | -3.92997900 | 0.23761800  | -0.54255900 |
| H  | -3.36954500 | 1.10527200  | 0.63179300  |
| Ge | 1.74162000  | 0.00576300  | -0.02120900 |

GeH(CH<sub>3</sub>)<sub>3</sub>...F<sub>2</sub>SnO...H<sub>2</sub>O(TT6)

|    |             |             |             |
|----|-------------|-------------|-------------|
| Sn | 1.32154600  | -0.20987600 | -0.09279000 |
| O  | 2.07819500  | -1.78677100 | -0.67257300 |
| F  | 1.11630400  | 1.47663500  | -1.02046600 |
| F  | 0.68924000  | 0.33325300  | 1.64556800  |
| H  | -0.62206700 | -0.50205600 | -0.53822100 |
| Ge | -2.03757900 | -0.01560900 | -0.03213900 |
| C  | -3.19544100 | -0.50503700 | -1.49909600 |
| H  | -2.90063200 | 0.01415300  | -2.40835200 |
| H  | -3.15712200 | -1.57770700 | -1.67538500 |
| H  | -4.21965000 | -0.22669000 | -1.25347000 |
| C  | -1.89639600 | 1.88407700  | 0.25079900  |
| H  | -1.18790300 | 2.07654600  | 1.05273000  |
| H  | -1.54951000 | 2.37875400  | -0.65321000 |
| H  | -2.87200500 | 2.28216700  | 0.52714700  |
| C  | -2.36265700 | -1.02125200 | 1.57996100  |
| H  | -2.30783800 | -2.09071500 | 1.38791400  |
| H  | -1.61773900 | -0.75052100 | 2.32454500  |
| H  | -3.35478100 | -0.78480400 | 1.96245600  |
| O  | 3.40587900  | 0.59746400  | 0.36138900  |
| H  | 3.60735800  | 1.38824100  | -0.15660800 |
| H  | 3.91162100  | -0.13535100 | -0.02802200 |

SnH(CH<sub>3</sub>)<sub>3</sub>...F<sub>2</sub>SiO...H<sub>2</sub>O(TT7)

|    |             |             |             |
|----|-------------|-------------|-------------|
| Si | -2.02704100 | -0.16610600 | 0.22945400  |
| F  | -1.91194800 | 1.39882600  | 0.60850800  |
| F  | -1.54508100 | -0.24459100 | -1.30353000 |
| O  | -2.37993400 | -1.34499000 | 1.16418200  |
| H  | -0.21051200 | -0.27964100 | 0.74346500  |
| C  | 2.69973500  | 0.05193400  | 1.66226700  |
| H  | 2.45682200  | 0.88178700  | 2.32140600  |
| H  | 2.64315600  | -0.87360400 | 2.22995100  |
| H  | 3.71865300  | 0.17901400  | 1.30192300  |
| C  | 1.22063900  | 1.84151900  | -1.01027800 |
| H  | 0.45013400  | 1.77471000  | -1.77436100 |
| H  | 0.95925900  | 2.63793200  | -0.31760200 |
| H  | 2.16982500  | 2.08349700  | -1.48348100 |
| C  | 1.67847400  | -1.66440900 | -1.26401700 |
| H  | 1.63379200  | -2.59294800 | -0.70004600 |
| H  | 0.90829900  | -1.68266000 | -2.03108700 |
| H  | 2.65363200  | -1.58903600 | -1.74047600 |
| O  | -3.91246000 | 0.10595300  | -0.30674300 |
| H  | -4.27509300 | 0.96394500  | -0.04865200 |
| H  | -4.25903600 | -0.56231100 | 0.31448300  |
| Sn | 1.34777900  | -0.00930600 | 0.02080000  |

SnH(CH<sub>3</sub>)<sub>3</sub>···F<sub>2</sub>GeO···H<sub>2</sub>O(**TT8**)

|    |             |             |             |
|----|-------------|-------------|-------------|
| Ge | -1.71679200 | -0.18303800 | 0.18695000  |
| F  | -1.59103000 | 1.48132900  | 0.68914900  |
| F  | -1.18282500 | -0.12024200 | -1.46591700 |
| O  | -2.32959600 | -1.47210700 | 1.02955500  |
| H  | 0.00273500  | -0.37003700 | 0.68255000  |
| C  | 2.82583000  | -0.10163000 | 1.73220300  |
| H  | 2.51273900  | 0.64475900  | 2.45779600  |
| H  | 2.75493400  | -1.08687900 | 2.18597600  |
| H  | 3.86285600  | 0.08618200  | 1.46105300  |
| C  | 1.41310500  | 1.93736500  | -0.82226000 |
| H  | 0.67315400  | 1.91159700  | -1.61754600 |
| H  | 1.08223700  | 2.63186400  | -0.05443300 |
| H  | 2.36639800  | 2.27364200  | -1.22397400 |
| C  | 1.92843900  | -1.55819200 | -1.39068700 |
| H  | 1.84356900  | -2.52444100 | -0.89984600 |
| H  | 1.18136500  | -1.49140700 | -2.17700100 |
| H  | 2.92090300  | -1.47098300 | -1.82756000 |
| O  | -3.67331500 | 0.30396800  | -0.44425100 |
| H  | -3.95880400 | 1.15032500  | -0.07516100 |
| H  | -4.06226200 | -0.39559400 | 0.11408300  |
| Sn | 1.59482500  | -0.00143500 | 0.00369200  |

SnH(CH<sub>3</sub>)<sub>3</sub>···F<sub>2</sub>SnO···H<sub>2</sub>O(**TT9**)

|    |             |             |             |
|----|-------------|-------------|-------------|
| H  | -0.28374400 | -0.38775100 | -0.88258100 |
| Sn | 1.59914500  | -0.10790400 | -0.28785300 |
| O  | 2.66668500  | -1.39463200 | -1.07811100 |
| F  | 1.30707800  | 1.76296700  | -0.64283200 |
| F  | 0.79542100  | -0.17385600 | 1.49923000  |
| Sn | -1.85855500 | -0.02787700 | 0.02152700  |
| C  | -3.19306700 | 0.00594900  | -1.66230700 |
| H  | -2.93734900 | 0.82805900  | -2.32648200 |
| H  | -3.12654900 | -0.92936700 | -2.21288800 |
| H  | -4.21791400 | 0.13816200  | -1.31988700 |
| C  | -1.58495200 | 1.86292000  | 0.97267100  |
| H  | -1.09588700 | 1.70591300  | 1.93007000  |
| H  | -0.94577900 | 2.48193000  | 0.34755700  |
| H  | -2.54413900 | 2.35518400  | 1.11863700  |
| C  | -2.10009200 | -1.73895300 | 1.28102800  |
| H  | -2.08146800 | -2.64969200 | 0.68702500  |
| H  | -1.28427600 | -1.75588500 | 1.99877300  |
| H  | -3.04933100 | -1.68470400 | 1.81048500  |
| O  | 3.51451700  | 0.36637800  | 0.89817300  |
| H  | 3.45213500  | 0.22184400  | 1.84880600  |
| H  | 3.98138100  | -0.39011600 | 0.50034800  |

SiH(CH<sub>3</sub>)<sub>3</sub>···F<sub>2</sub>SiO···H<sub>2</sub>O(**TH1**)

|    |             |             |             |
|----|-------------|-------------|-------------|
| H  | -0.04779500 | -0.23969300 | -0.63736800 |
| Si | -1.58873500 | -0.16812600 | -0.05610200 |
| F  | -2.20657400 | -0.81944400 | -1.37193100 |
| F  | -1.46814200 | -1.39579900 | 0.96204800  |
| O  | -1.84967400 | 1.27526000  | 0.40354200  |
| C  | 2.36581500  | 0.61490800  | -1.26317200 |
| H  | 2.27817300  | 0.20214800  | -2.26713300 |
| H  | 1.98954200  | 1.63746300  | -1.24825800 |
| H  | 3.42124100  | 0.61956000  | -0.98390500 |
| C  | 1.66167900  | -2.22755900 | -0.10966400 |
| H  | 0.95037600  | -2.74164400 | 0.53529000  |

|                                                                                 |             |             |             |
|---------------------------------------------------------------------------------|-------------|-------------|-------------|
| H                                                                               | 1.54839400  | -2.59855100 | -1.12758200 |
| H                                                                               | 2.67065300  | -2.46984300 | 0.22933200  |
| C                                                                               | 1.33215800  | 0.32181000  | 1.68461500  |
| H                                                                               | 1.03305700  | 1.36828700  | 1.63853200  |
| H                                                                               | 0.63868100  | -0.23177100 | 2.31561900  |
| H                                                                               | 2.32790400  | 0.25856400  | 2.12935100  |
| O                                                                               | 0.25246100  | 2.89559800  | -0.08404200 |
| H                                                                               | -0.59792100 | 2.43672500  | 0.10483000  |
| H                                                                               | 0.00420400  | 3.80706500  | -0.25944600 |
| Si                                                                              | 1.40843000  | -0.38422700 | -0.02725400 |
| <b>SiH(CH<sub>3</sub>)<sub>3</sub>···F<sub>2</sub>GeO···H<sub>2</sub>O(TH2)</b> |             |             |             |
| H                                                                               | 0.25010900  | -0.08783000 | -0.60442600 |
| O                                                                               | -1.76161500 | 1.43342700  | 0.43369500  |
| F                                                                               | -1.92796500 | -0.89739700 | -1.43446800 |
| F                                                                               | -1.14588100 | -1.39670000 | 1.07130900  |
| Si                                                                              | 1.70381800  | -0.35414100 | -0.01736800 |
| C                                                                               | 2.72436300  | 0.58915100  | -1.24694800 |
| H                                                                               | 2.60942600  | 0.18576900  | -2.25197500 |
| H                                                                               | 2.41565400  | 1.63302800  | -1.23236800 |
| H                                                                               | 3.77790200  | 0.52227800  | -0.96823300 |
| C                                                                               | 1.83771300  | -2.20697600 | -0.12215800 |
| H                                                                               | 1.09510500  | -2.67890300 | 0.51921800  |
| H                                                                               | 1.69746000  | -2.55656300 | -1.14433200 |
| H                                                                               | 2.83072000  | -2.51658100 | 0.20947800  |
| C                                                                               | 1.65453800  | 0.34160400  | 1.70004200  |
| H                                                                               | 1.39490200  | 1.39886700  | 1.65993900  |
| H                                                                               | 0.93429700  | -0.19134600 | 2.31921000  |
| H                                                                               | 2.64208300  | 0.23779400  | 2.15434500  |
| O                                                                               | 0.50565900  | 2.81607300  | -0.14046400 |
| H                                                                               | -0.38669000 | 2.46663800  | 0.08595400  |
| H                                                                               | 0.34935400  | 3.72433400  | -0.41301900 |
| Ge                                                                              | -1.34535000 | -0.08972900 | -0.03605200 |
| <b>SiH(CH<sub>3</sub>)<sub>3</sub>···F<sub>2</sub>SnO···H<sub>2</sub>O(TH3)</b> |             |             |             |
| H                                                                               | 0.56670900  | -0.07929800 | -0.66358200 |
| Sn                                                                              | -1.21664600 | -0.07037500 | -0.01689500 |
| O                                                                               | -1.68924700 | 1.61154000  | 0.56085900  |
| F                                                                               | -1.80672500 | -0.99999000 | -1.58123500 |
| F                                                                               | -0.87295800 | -1.57543600 | 1.12838800  |
| Si                                                                              | 1.99023000  | -0.30746200 | -0.03056800 |
| C                                                                               | 3.06296500  | 0.67442400  | -1.18535500 |
| H                                                                               | 3.00565000  | 0.28792900  | -2.20198500 |
| H                                                                               | 2.74127500  | 1.71402400  | -1.17237600 |
| H                                                                               | 4.10142300  | 0.61593900  | -0.85385700 |
| C                                                                               | 2.18759900  | -2.15509200 | -0.13687600 |
| H                                                                               | 1.41871500  | -2.64790700 | 0.45693700  |
| H                                                                               | 2.11694500  | -2.50278400 | -1.16685900 |
| H                                                                               | 3.16586400  | -2.44194200 | 0.25313500  |
| C                                                                               | 1.85362000  | 0.35410800  | 1.70013300  |
| H                                                                               | 1.55322900  | 1.40110700  | 1.67820800  |
| H                                                                               | 1.13780400  | -0.22387700 | 2.28420500  |
| H                                                                               | 2.82653800  | 0.28032700  | 2.18999000  |
| O                                                                               | 0.63354100  | 2.78136600  | -0.21838700 |
| H                                                                               | -0.27059600 | 2.53850000  | 0.09506200  |
| H                                                                               | 0.54319100  | 3.67615500  | -0.55773600 |
| <b>GeH(CH<sub>3</sub>)<sub>3</sub>···F<sub>2</sub>SiO···H<sub>2</sub>O(TH4)</b> |             |             |             |
| H                                                                               | -0.31970900 | -0.99819800 | -0.21647700 |



|    |             |             |             |
|----|-------------|-------------|-------------|
| Si | -1.80417900 | -0.31071900 | -0.07096900 |
| F  | -2.49890100 | -1.36328200 | -1.10816900 |
| F  | -2.10480000 | -0.95982300 | 1.40053200  |
| O  | -1.71698500 | 1.23249600  | -0.33306400 |
| Ge | 1.20015900  | -0.31765200 | -0.01831500 |
| C  | 1.43063700  | 0.73843200  | -1.62241500 |
| H  | 1.14799200  | 0.15166600  | -2.50913400 |
| H  | 0.82276000  | 1.65043100  | -1.55394700 |
| H  | 2.49342900  | 1.01841400  | -1.70979900 |
| C  | 2.16749500  | -2.01054500 | 0.00239000  |
| H  | 1.84166200  | -2.63552200 | 0.84702300  |
| H  | 2.01853100  | -2.56239900 | -0.93738800 |
| H  | 3.24451900  | -1.80428900 | 0.11768500  |
| C  | 1.11066800  | 0.56985300  | 1.70031000  |
| H  | 0.62056000  | 1.54764100  | 1.59522900  |
| H  | 0.57151900  | -0.05925000 | 2.42441900  |
| H  | 2.13991700  | 0.72109800  | 2.06584800  |
| O  | 0.03496700  | 3.25198100  | 0.11694800  |
| H  | -0.69959000 | 2.61378500  | -0.03525800 |
| H  | -0.39154100 | 4.11723500  | 0.10740200  |

GeH(CH<sub>3</sub>)<sub>3</sub>...F<sub>2</sub>GeO...H<sub>2</sub>O(**TH5**)

|    |             |             |             |
|----|-------------|-------------|-------------|
| H  | -0.01531500 | -0.03870400 | -0.63990000 |
| Ge | -1.58632400 | -0.11565600 | -0.04501200 |
| F  | -2.18261500 | -0.94159700 | -1.42848300 |
| F  | -1.31639400 | -1.41989400 | 1.05477800  |
| O  | -2.06771100 | 1.38158700  | 0.45137200  |
| Ge | 1.49218700  | -0.22633500 | -0.00975100 |
| C  | 2.49906600  | 0.81174500  | -1.27247000 |
| H  | 2.43253500  | 0.38511000  | -2.27031700 |
| H  | 2.10532900  | 1.82438800  | -1.26567600 |
| H  | 3.54304100  | 0.81943600  | -0.95895300 |
| C  | 1.70883200  | -2.13621200 | -0.12182600 |
| H  | 0.96200300  | -2.62418800 | 0.49954100  |
| H  | 1.60942200  | -2.47938800 | -1.14900600 |
| H  | 2.70277900  | -2.39776100 | 0.24061700  |
| C  | 1.35511100  | 0.48166300  | 1.76835500  |
| H  | 1.03116600  | 1.51806300  | 1.71445300  |
| H  | 0.65303600  | -0.10564300 | 2.35543700  |
| H  | 2.33891500  | 0.43073100  | 2.23511900  |
| O  | 0.13735900  | 2.83472900  | -0.14749100 |
| H  | -0.74046100 | 2.45226100  | 0.08950600  |
| H  | -0.05420900 | 3.73912200  | -0.41047100 |

GeH(CH<sub>3</sub>)<sub>3</sub>...F<sub>2</sub>SnO...H<sub>2</sub>O(**TH6**)

|    |             |             |             |
|----|-------------|-------------|-------------|
| H  | 0.29651700  | -0.03581900 | -0.68657900 |
| Sn | -1.47071800 | -0.08135600 | -0.02442800 |
| O  | -1.99003600 | 1.59698900  | 0.52895800  |
| F  | -2.07696900 | -1.06708200 | -1.54875400 |
| F  | -1.06304200 | -1.54852500 | 1.15261900  |
| C  | 2.83014800  | 0.84739000  | -1.22741000 |
| H  | 2.79796900  | 0.43616000  | -2.23348600 |
| H  | 2.44079700  | 1.86161200  | -1.22488400 |
| H  | 3.86233600  | 0.84764100  | -0.87788400 |
| C  | 2.02185800  | -2.11471600 | -0.12150900 |
| H  | 1.25429100  | -2.60815000 | 0.47053600  |
| H  | 1.96761200  | -2.46295300 | -1.15039200 |
| H  | 3.00213200  | -2.36516500 | 0.28291600  |

|    |             |             |             |
|----|-------------|-------------|-------------|
| C  | 1.57826300  | 0.47817600  | 1.76335000  |
| H  | 1.21871100  | 1.50358500  | 1.72113200  |
| H  | 0.89048600  | -0.14318400 | 2.33311800  |
| H  | 2.55326900  | 0.45832400  | 2.24996400  |
| O  | 0.31938400  | 2.80869000  | -0.21227100 |
| H  | -0.58443300 | 2.53959900  | 0.08396400  |
| H  | 0.22070700  | 3.71998500  | -0.50135000 |
| Ge | 1.77060000  | -0.20793500 | -0.02189200 |
